1  
2  
3  
4  
5  
6  
7  
8  
9  
10  
11  
12  
13  
14  
15  
16  
17  
18  
19  
20  
21  
22  
23  
24  
25  
26  
27  
28  
29  
30  
31  
32  
33  
34  
35

## **SWR1-independent association of H2A.Z to the LINC complex promotes meiotic chromosome motion**

Sara González-Arranz<sup>1</sup>, Jennifer M. Gardner<sup>2</sup>, Zulin Yu<sup>2</sup>, Neem J. Patel<sup>3\*</sup>, Jonna Heldrich<sup>3</sup>, Beatriz Santos<sup>1</sup>, Jesús A. Carballo<sup>4</sup>, Sue L. Jaspersen<sup>2,5</sup>, Andreas Hochwagen<sup>3</sup> and Pedro A. San-Segundo<sup>1\*\*</sup>

<sup>1</sup>Instituto de Biología Funcional y Genómica (IBFG). Consejo Superior de Investigaciones Científicas (CSIC) and University of Salamanca. 37007-Salamanca, Spain

<sup>2</sup>Stowers Institute for Medical Research. Kansas City, MO. USA.

<sup>3</sup>Department of Biology. New York University. New York, NY. USA.

<sup>4</sup>Centro de Investigaciones Biológicas Margarita Salas. Consejo Superior de Investigaciones Científicas (CSIC). 28040-Madrid, Spain

<sup>5</sup>Department of Molecular and Integrative Physiology, University of Kansas Medical Center. Kansas City, KS. USA.

\*Current address: Department of Plant & Microbial Biology, University of California Berkeley, CA. USA.

\*\*Corresponding author:

ORCID: 0000-0002-5616-574X

E-mail: [pedross@usal.es](mailto:pedross@usal.es)

Phone: +34 923294902

Mailing address: Instituto de Biología Funcional y Genómica (IBFG). CSIC-USAL.

C/ Zacarías González, 2. 37007-Salamanca, Spain

**Running title:** H2A.Z promotes meiotic chromosome movement

36 **Keywords**

37

38 Meiosis, chromosome movement, LINC complex, H2A.Z, Mps3, Ndj1, yeast

39

40

41

42

43 **Non-standard abbreviations**

44

45 BiFC: Bimolecular Fluorescence Complementation

46 DIC: Differential Interference Contrast

47 KAc: Potassium Acetate

48 NE: Nuclear Envelope

49 LINC: Linker of the Nucleoskeleton and Cytoskeleton

50 rDNA: Ribosomal DNA

51 SC: Synaptonemal Complex

52 SIM: Structured Illumination Microscopy

53 SPB: Spindle Pole Body

54 VC: C-terminal moiety of the Venus fluorescent protein

55 VN: N-terminal moiety of the Venus fluorescent protein

56 WCE: Whole cell extracts

57

58 **ABSTRACT**

59

60 The H2A.Z histone variant is deposited into chromatin by the SWR1 complex affecting  
61 multiple aspects of meiosis. Here we describe a SWR1-independent localization of H2A.Z at  
62 meiotic telomeres and the centrosome. We demonstrate that H2A.Z colocalizes and interacts  
63 with Mps3, the SUN component of the LINC complex that spans the nuclear envelope and links  
64 meiotic telomeres to the cytoskeleton promoting meiotic chromosome movement. H2A.Z also  
65 interacts with the meiosis-specific Ndj1 protein that anchors telomeres to the nuclear periphery  
66 via Mps3. Telomeric localization of H2A.Z depends on Ndj1 and the N-terminal domain of  
67 Mps3. Although telomeric attachment to the nuclear envelope is maintained in the absence of  
68 H2A.Z, the distribution of Mps3 is altered. The velocity of chromosome movement during  
69 meiotic prophase I is reduced in the *htz1Δ* mutant lacking H2A.Z, but it is unaffected in *swr1Δ*  
70 cells. We reveal that H2A.Z is an additional LINC-associated factor that contributes to promote  
71 telomere-driven chromosome motion critical for error-free gametogenesis.

72

73

## 74 INTRODUCTION

75

76 Meiosis is a special form of cell division that lies at the heart of gametogenesis in most  
77 sexually reproducing organisms. During meiosis, a series of complex DNA and chromosome  
78 interactions culminate in the accurate segregation of a haploid complement of chromosomes to  
79 the gametes (Duro and Marston, 2015; Hunter, 2015; Keeney et al., 2014; Zickler and Kleckner,  
80 2015). Chromatin remodeling events, including histone post-translational modifications and  
81 incorporation of histone variants, play important roles in several processes during meiotic  
82 development (Brachet et al., 2012; Crichton et al., 2014; Ontoso et al., 2014; Yamada et al.,  
83 2018a; Yamada and Ohta, 2013).

84 H2A.Z is a variant of the canonical H2A histone that is incorporated into chromatin by  
85 the action of the ATP-dependent SWR1 remodeling complex. SWR1 replaces an H2A-H2B  
86 dimer by H2A.Z-H2B at defined nucleosomes, preferentially in the vicinity of promoter regions  
87 (Luk et al., 2010; Raisner et al., 2005). H2A.Z participates in a number of fundamental  
88 biological processes in vegetative cells including transcription regulation, chromatin silencing,  
89 DNA damage response and chromosome segregation (Adkins et al., 2013; Billon and Cote,  
90 2013; Morillo-Huesca et al., 2010; Weber and Henikoff, 2014). In addition, although the  
91 number of meiotic reports is scarce, the roles of H2A.Z during meiosis are also beginning to be  
92 elucidated in some model organisms. In plants and fission yeast, H2A.Z is required for initiation  
93 of meiotic recombination, although the precise event influenced by H2A.Z appears to be  
94 different in both organisms. In *Arabidopsis thaliana*, H2A.Z has been proposed to regulate  
95 meiotic double-strand break (DSB) formation and repair by its association to hotspots and by  
96 controlling the expression pattern of recombination genes, whereas in *Schizosaccharomyces*  
97 *pombe*, H2A.Z impacts meiotic recombination by modulating chromatin architecture and the  
98 binding of DSB-formation proteins to cohesin-rich domains (Choi et al., 2013; Qin et al., 2014;  
99 Rosa et al., 2013; Yamada et al., 2018b). H2A.Z is also required for proper meiotic development  
100 in *Saccharomyces cerevisiae*. The budding yeast *htz1*  $\Delta$  mutant (lacking H2A.Z) displays slower  
101 kinetics of meiotic progression, reduced spore viability and misregulated meiotic gene  
102 expression, but meiotic recombination is not, at least drastically, affected. In addition, the  
103 meiotic checkpoint response triggered by the absence of the synaptonemal complex (SC) Zip1  
104 protein is altered in the *htz1*  $\Delta$  mutant (Gonzalez-Arranz et al., 2018). Not surprisingly, many of  
105 the meiotic functions mentioned above for H2A.Z rely on its chromatin deposition mediated by  
106 the SWR1 complex.

107 Curiously, the physical interaction of H2A.Z with non-chromatin components has been  
108 reported in high-throughput analyses in *S. cerevisiae* (Bommi et al., 2019; Uetz et al., 2000; Yu



109 et al., 2008). In particular, H2A.Z interacts with the SUN domain-containing Mps3 protein  
110 (Gardner et al., 2011). SUN proteins are one of the main components of the evolutionarily  
111 conserved LINC (Linker of the Nucleoskeleton and Cytoskeleton) complex that physically  
112 connects the nuclear contents with cytoskeletal filaments. The LINC complex is composed of  
113 an ensemble of KASH-SUN proteins. The KASH proteins span the outer nuclear membrane to  
114 interact with the cytoskeleton and also interact in the perinuclear space with SUN proteins. The  
115 SUN proteins, in turn, are embedded in the inner nuclear membrane and protrude towards the  
116 nuclear inside (reviewed by (Chang et al., 2015)). LINC complexes participate in a number of  
117 cellular functions, such as nuclear positioning, centrosome dynamics and attachment to the  
118 nuclear envelope (NE), and DNA Repair (Fernandez-Alvarez et al., 2016; Friederichs et al.,  
119 2011; Lawrence et al., 2016; Lee and Burke, 2018). LINC complexes also play a fundamental  
120 role in meiotic chromosome movement in all organisms studied (reviewed by (Burke, 2018;  
121 Link and Jantsch, 2019)). In budding yeast, two KASH proteins (Mps2 and Csm4) and one  
122 SUN protein (Mps3) have been described. In mitotic cells, Mps2 localizes at the yeast  
123 centrosome-equivalent called spindle pole body (SPB) forming a non-canonical LINC complex  
124 with Mps3 (Chen et al., 2019). In contrast, the meiotically induced Csm4 protein forms LINC  
125 complexes with Mps3 along the NE. A recent report has shown that, during meiotic prophase,  
126 Mps2 also interacts with Csm4 at the NE mediating the coupling with the Myo2 microfilament  
127 motor associated to the actin cytoskeleton (Lee et al., 2020). During meiotic prophase,  
128 telomeres are anchored to the nucleoplasmic N-terminal domain of Mps3 by the mediation of  
129 the meiosis-specific Ndj1 protein. Forces generated in the cytoplasm by the actin cytoskeleton  
130 are transduced through the Myo2/Csm4-Mps3-Ndj1 axis to promote telomere-led chromosome  
131 movement (Figure 1A). Besides facilitating homolog interactions that sustain meiotic  
132 recombination and chromosome synapsis, these movements have been also proposed to be  
133 important to disengage non-homologous chromosome links (Chua and Roeder, 1997; Conrad  
134 et al., 1997; Conrad et al., 2008; Conrad et al., 2007; Kosaka et al., 2008; Koszul et al., 2008;  
135 Rao et al., 2011; Trelles-Sticken et al., 2000; Wanat et al., 2008).

136 Recent studies have revealed that the telomere-associated Ndj1 protein also localizes to  
137 the SPB during meiotic prophase by interacting with Mps3. Ndj1 protein stability in  
138 combination with controlled proteolysis of Mps3 at the SPB half-bridge regulate the separation  
139 of duplicated SPBs upon meiosis I entry (Li et al., 2017; Li et al., 2015). These and other  
140 observations in different organisms support a connection between telomere and centrosome  
141 functions that coordinate NE dynamics and meiotic progression (Fernandez-Alvarez and  
142 Cooper, 2017).

143 Although most of the roles of the H2A.Z histone variant have been ascribed to its  
144 SWR1-dependent chromatin deposition, here we characterize in detail a SWR1-independent  
145 interaction of H2A.Z with LINC-associated components, including Mps3 and Ndj1, during  
146 meiotic prophase. We show that H2A.Z colocalizes with the SUN protein Mps3 at telomeres  
147 and demonstrate that the Mps3-H2A.Z interaction does not occur in the context of chromatin,  
148 but depends on the stable attachment of telomeres to the NE. We demonstrate that H2A.Z is an  
149 additional novel factor connected with LINC complexes during meiotic prophase that is  
150 required for proper meiotic chromosome movement (Figure 1A). We propose that at least some  
151 of the meiotic defects of the *htz1* mutant may stem from faulty processes impacted by LINC  
152 function.

153

154

## 155 RESULTS

156

### 157 H2A.Z remains at chromosome ends in the absence of SWR1

158 Our previous cytological studies have shown that H2A.Z extensively decorates meiotic  
159 chromatin in wild-type pachytene chromosomes, except in the rDNA region where its presence  
160 is markedly reduced (Gonzalez-Arranz et al., 2018). In the *swr1Δ* mutant, the bulk of  
161 chromatin-associated H2A.Z is lost (Gonzalez-Arranz et al., 2018), but H2A.Z foci persisted in  
162 the absence of the SWR1 complex, as seen in enhanced images (Figure 1B, 1C). Double  
163 staining with Zip1 antibodies, as a marker of synapsed chromosomes, showed that these SWR1-  
164 independent H2A.Z foci were primarily located at chromosome ends (Figure 1B); 65.4% of  
165 *swr1Δ* spread nuclei scored (n=26) displayed H2A.Z at telomeres. Consistent with this  
166 telomeric localization, *swr1Δ* live meiotic cells expressing a functional *HTZ1-GFP* fusion  
167 occasionally displayed H2A.Z spots concentrated at the nuclear periphery in addition to a  
168 diffused pan-nuclear signal (Figure 1D). Curiously, whereas H2A.Z is largely excluded from  
169 the rDNA chromatin in wild-type nuclei (88.9%; n=27 nuclei), the *swr1Δ* mutant displayed an  
170 accumulation of H2A.Z in the nucleolar area (Figure 1B, arrowhead) (50.0%; n=26 nuclei).  
171 Nevertheless, this amorphous H2A.Z mass was mainly found inside the loop defined by the  
172 unsynapsed rDNA array characteristic of pachytene chromosomes, but it did not appear to be  
173 associated with chromatin. A schematic representation of H2A.Z chromosomal localization at  
174 pachytene based on cytological observations, in both wild type and *swr1Δ*, is depicted in Figure  
175 1E.

176

177  
178  
179  
180  
181  
182  
183  
184  
185  
186  
187  
188  
189  
190  
191  
192  
193  
194  
195  
196  
197  
198  
199  
200  
201  
202  
203  
204  
205  
206  
207  
208  
209  
210  
211

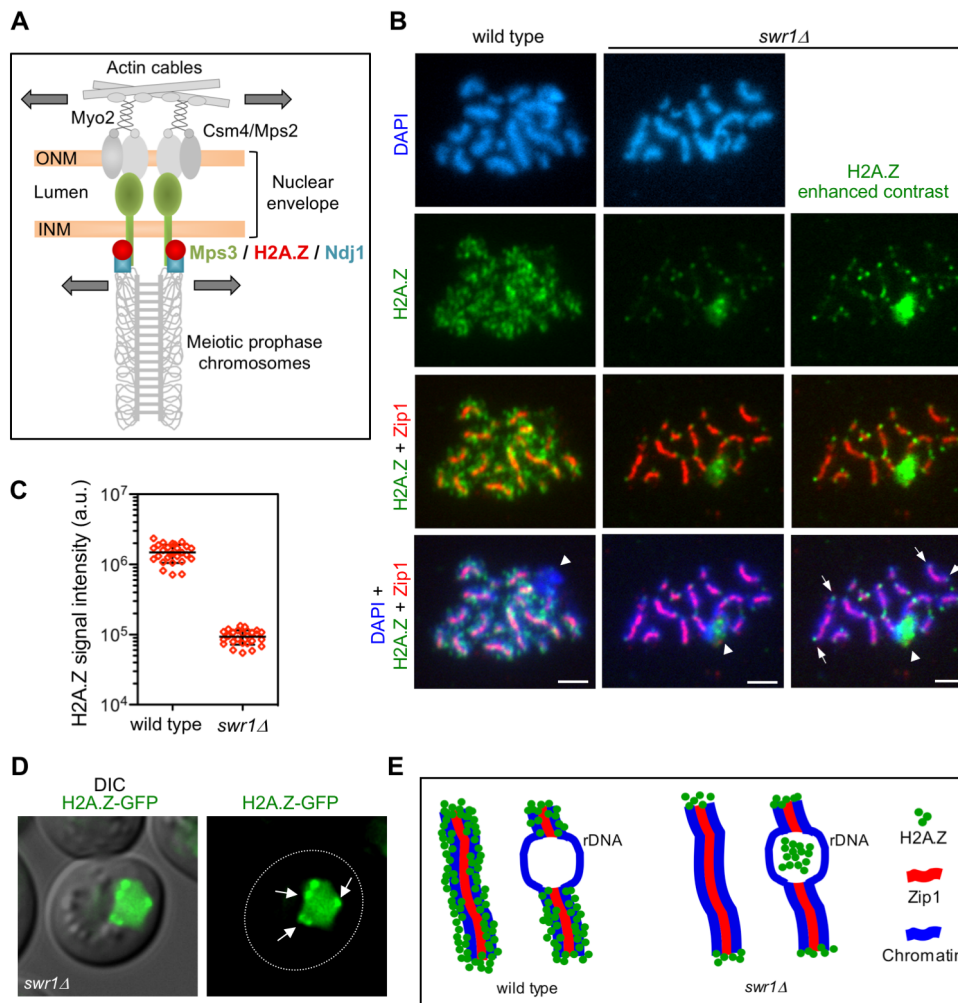

**Figure 1. H2A.Z localizes to chromosome ends during meiotic prophase I.**

(A) Model for LINC-dependent meiotic chromosome movement. Schematic representation of the main components involved in promoting chromosome motion during meiotic prophase I in *Saccharomyces cerevisiae*, including H2A.Z as described here. Colored proteins are the focus of this work. Motion is depicted with arrows. See text for details. ONM: Outer nuclear membrane. INM: Inner nuclear membrane. (B) Immunofluorescence of spread pachytene chromosomes from wild type and *swr1Δ* stained with DAPI to visualize chromatin (blue), anti-GFP to detect H2A.Z (green), and anti-Zip1 to mark the SC central region (red). The H2A.Z signal in *swr1Δ* was obtained using a 4-times longer exposure time compared to the wild type. In addition, the contrast of the image shown in the rightmost column was computer-enhanced. Representative nuclei are shown. Spreads were prepared 16 h after meiotic induction. Arrows point to some telomeric H2A.Z foci. Arrowheads mark the nucleolar rDNA region devoid of Zip1. Scale bar, 2 μm. (C) Quantification of the total H2A.Z signal in nuclear spreads prepared as in (B). 27 and 26 nuclei from wild type and *swr1Δ*, respectively, were scored. Mean and standard deviation values are represented. (D) Representative images from a *swr1Δ* live cell expressing *HTZI-GFP* 16 h after meiotic induction. Arrows point to H2A.Z foci at the nuclear periphery that stick out over the diffuse pan-nuclear H2A.Z-GFP signal. Scale bar, 2 μm. (E) Cartoon representing H2A.Z localization in wild-type and *swr1Δ* pachytene chromosome based on our cytological observations. Strains in (B-C) are: DP840 (*HTZI-GFP*) and DP841 (*HTZI-GFP swr1Δ*). Strain in (D) is DP1108 (*HTZI-GFP swr1Δ*).

## 212 **Genome-wide association of H2A.Z to meiotic chromatin requires SWR1**

213         Next, we used ChIP-seq to confirm at higher resolution the SWR1 dependency for  
214 H2A.Z binding to chromatin during meiotic prophase I. Samples from cultures of wild-type and  
215 *swr1Δ* cells expressing *HTZI-GFP* were processed at zero and 15 hours after meiotic induction.  
216 Samples from an untagged control were also taken at the same time points. Profiles of H2A.Z  
217 distribution in all chromosomes showed no strong difference between mitotic (t=0h) and  
218 meiotic prophase cells (t=15h) and revealed that genome-wide incorporation of H2A.Z is  
219 abolished in the absence of SWR1 (Figure S1A-S1C). Consistent with previous reports in  
220 mitotic cells showing that H2A.Z is enriched at the nucleosomes flanking the transcription start  
221 site of genes (Luk et al., 2010; Raisner et al., 2005), our analysis of H2A.Z position relative to  
222 ORFs revealed that, indeed, H2A.Z was enriched at the beginning of ORFs in mitotic cells, thus  
223 validating this ChIP-seq study (Figure S1D). We also found the same situation in meiotic cells  
224 (Figure S1E). Importantly, the meta-ORF profiles of the *swr1Δ* mutant were similar to those of  
225 the untagged control implying that H2A.Z chromatin binding to gene promoters was completely  
226 abolished in the absence of SWR1 (Figure S1D, S1E). Thus, like in mitotic cells, the SWR1  
227 complex is absolutely required for genome-wide H2A.Z chromatin deposition also during  
228 meiotic prophase I.

229

## 230 **H2A.Z interacts and colocalizes with Mps3 at telomeres during meiotic prophase**

231         Previous studies in vegetative cells have described a physical interaction between  
232 H2A.Z and the Mps3 protein (Gardner et al., 2011; Morillo-Huesca et al., 2019). Moreover, a  
233 recent study also reported co-purification of H2A.Z and Mps3 from meiotic cells using mass  
234 spectrometry analysis (Bommi et al., 2019). Consistent with these observations, we found that  
235 the H2A.Z-GFP foci detected in some *swr1Δ* live meiotic cells at the nuclear periphery  
236 colocalized with Mps3-mCherry (Figure 2A, arrows). Note that there was also a peripheral zone  
237 with H2A.Z-GFP, but devoid of Mps3-mCherry (Figure 2A, arrowhead), that corresponds to  
238 the accumulation of H2A.Z observed in the vicinity of the nucleolar area in the *swr1Δ* mutant  
239 (Figure 1B, 1E; Figure S2; see also Figure 2B). We next used chromosome spreading for a  
240 more detailed analysis of H2A.Z and Mps3 colocalization. It has been shown that, despite being  
241 embedded in the inner nuclear membrane, the Mps3 protein remains associated to the telomeres  
242 in spread preparations of meiotic prophase nuclei (Conrad et al., 2007; Lee et al., 2012). We  
243 detected a significant colocalization of H2A.Z and Mps3 foci at telomeres of meiotic prophase  
244 chromosomes (Pearson's correlation coefficient 0.741; n=27 nuclei) (Figure 2B), suggesting  
245 that H2A.Z and Mps3 also interact during meiotic prophase. To confirm the meiotic interaction  
246 between H2A.Z and Mps3 we carried out co-immunoprecipitation experiments. We found that

247  
248  
249  
250  
251  
252  
253  
254  
255  
256  
257  
258  
259  
260  
261  
262  
263  
264  
265  
266  
267  
268  
269  
270  
271  
272  
273  
274  
275  
276  
277  
278  
279  
280  
281  
282  
283  
284  
285  
286  
287  
288  
289  
290  
291  
292  
293  
294  
295  
296  
297

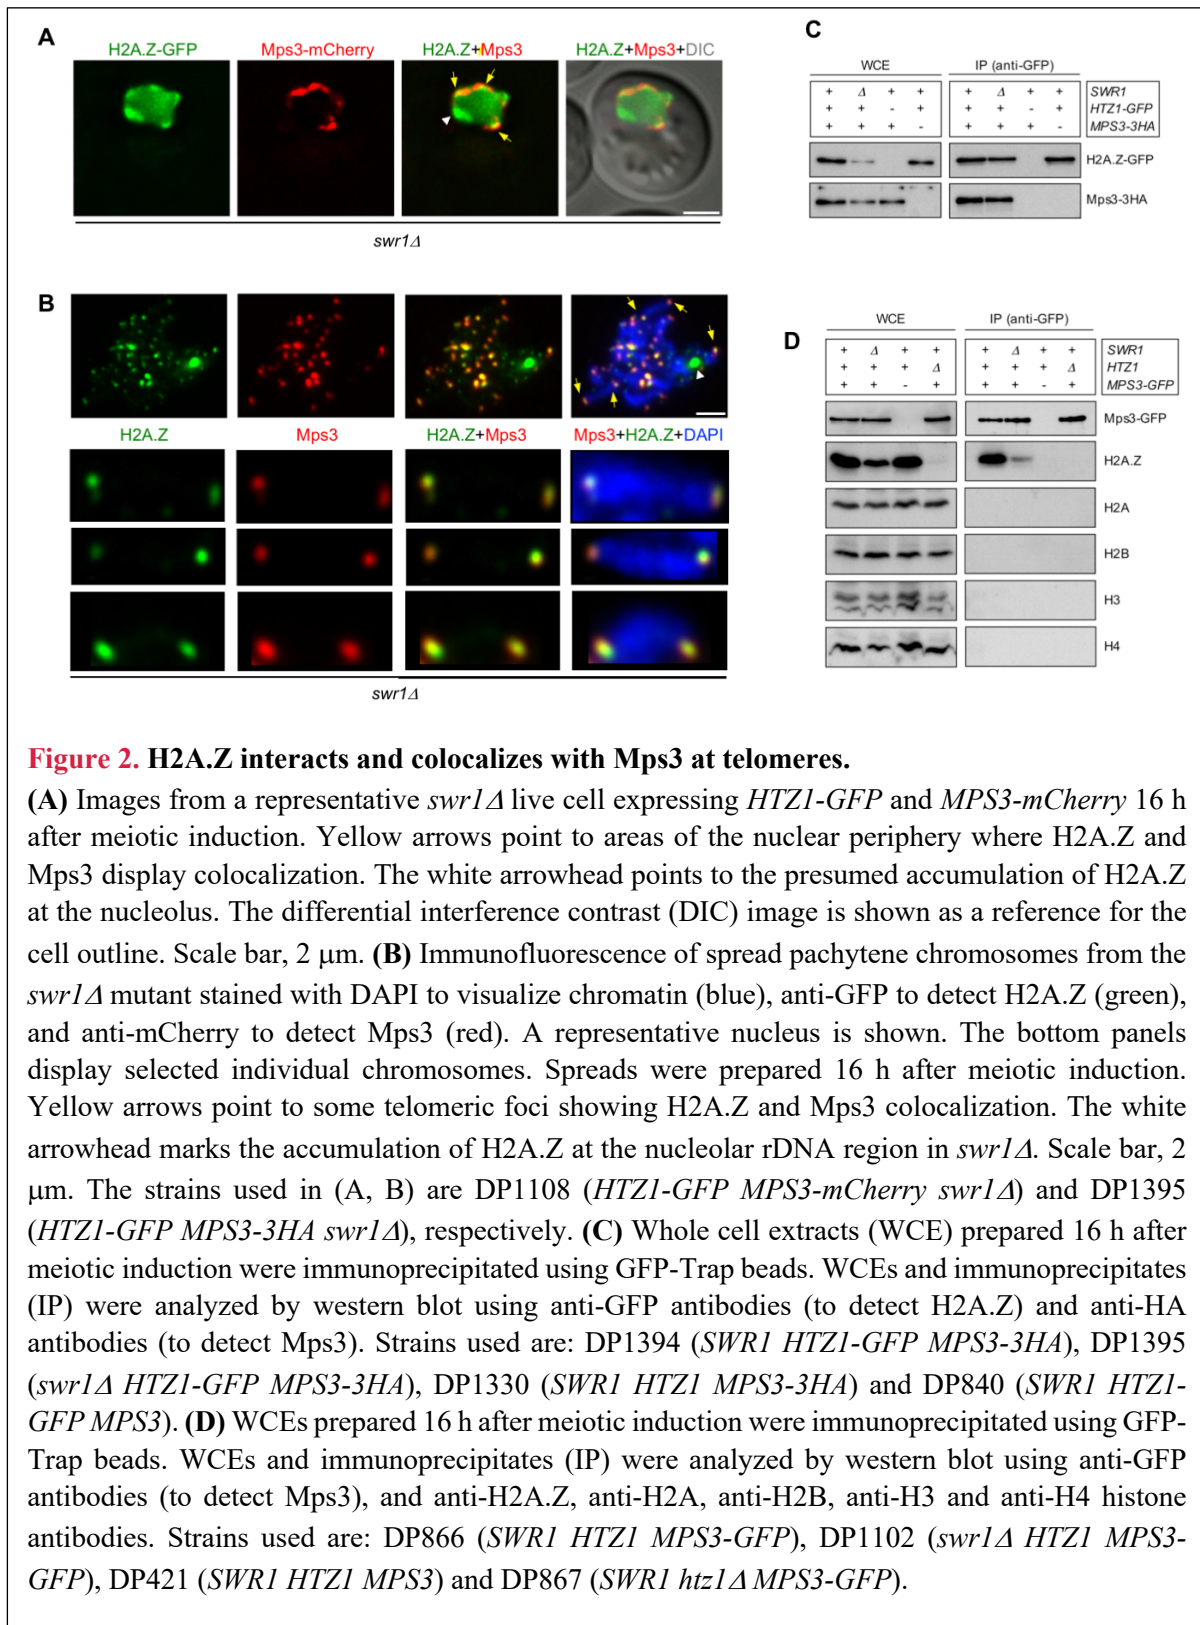

Mps3 (tagged with 3HA) was detected in immunoprecipitates of *HTZI-GFP* strains pulled down with anti-GFP antibodies (Figure 2C). Conversely, H2A.Z was present in immunoprecipitates of *MPS3-GFP* meiotic cells pulled down with anti-GFP antibodies (Figure 2D). Although the amount of H2A.Z was reduced in whole cell extracts (WCE) from the *swr1Δ*



298 mutant, co-immunoprecipitation of H2A.Z and Mps3 occurred both in wild-type and *swr1Δ*  
299 meiotic cells (Figure 2C, 2D). Of note, immunoprecipitation of Mps3-GFP specifically brought  
300 down H2A.Z, but not the canonical histones (Figure 2D). In sum, these observations indicate  
301 that Mps3 and H2A.Z physically interact during meiotic prophase in a SWR1-independent  
302 manner. The colocalization at the end of chromosomes suggests that the Mps3-H2A.Z  
303 interaction occurs, at least, in the proximity of telomeres.

304

### 305 **H2A.Z and Ndj1 interact at the nuclear periphery**

306 We used the Bimolecular Fluorescence Complementation technique (BiFC) to further  
307 explore the physical interaction between H2A.Z and other LINC-associated components, such  
308 as Ndj1. BiFC permits direct visualization of protein interaction in living cells based on the  
309 association between two nonfluorescent fragments of a fluorescent protein brought in proximity  
310 by the interaction between proteins fused to the fragments (Kerppola, 2008; Miller et al., 2015).  
311 We found that H2A.Z and Ndj1 interact at the NE, as manifested by the reconstitution of  
312 fluorescence from the Venus variant of the Yellow Fluorescent Protein (Venus<sup>YFP</sup>) at the  
313 nuclear periphery in meiotic cells simultaneously expressing both moieties of Venus<sup>YFP</sup> fused  
314 to H2A.Z and Ndj1 (*HTZI-VN* and *NDJI-VC*, respectively) (Figure 3A, 3D). Importantly, the  
315 H2A.Z-Ndj1 interaction was detected not only in the *swr1Δ* mutant, but also in the wild type  
316 (Figure 3B, 3D). This result indicates that the telomeric localization of H2A.Z is not an  
317 exclusive feature of the *swr1Δ* mutant, and also occurs in the wild type where it is masked in  
318 our cytological analysis of spread nuclei by the massive deposition of H2A.Z throughout the  
319 genome. We detected the reconstituted Venus<sup>YFP</sup> signal in a fraction of cells in the culture  
320 (24.2% and 27.3% for wild type and *swr1Δ*, respectively) that roughly represents the population  
321 of prophase cells in the asynchronous BR strain background at the time point analyzed. In fact,  
322 a parallel meiotic culture used as a control for staging displayed ≈34% cells with Zip1-GFP  
323 signal at the same time point. Indeed, the use of a *ndt80Δ* mutation that prevents exit from  
324 prophase I increased the proportion of cells displaying H2A.Z-Ndj1 interaction to 54% and  
325 55% in *SWRI* and *swr1Δ*, respectively, and the fraction of cells containing the Hop1-GFP  
326 prophase I marker to 70% (Figure S3). That is, the interaction was detected in ~80% of prophase  
327 cells. This is consistent with the observation that Ndj1-mediated tethering of telomeres to the  
328 NE only occurs in meiotic prophase I (Conrad et al., 2007). Of note, when the BiFC assay was  
329 performed in cells also expressing *MPS3-mCherry*, we observed that the Venus<sup>YFP</sup> signal  
330 resulting from H2A.Z-Ndj1 interaction largely colocalized with Mps3 foci, thus confirming  
331 that it occurs at telomere attachment sites at the NE (Figure 3C; upper row).

332  
333  
334  
335  
336  
337  
338  
339  
340  
341  
342  
343  
344  
345  
346  
347  
348  
349  
350  
351  
352  
353  
354  
355  
356  
357  
358  
359  
360  
361  
362  
363  
364  
365

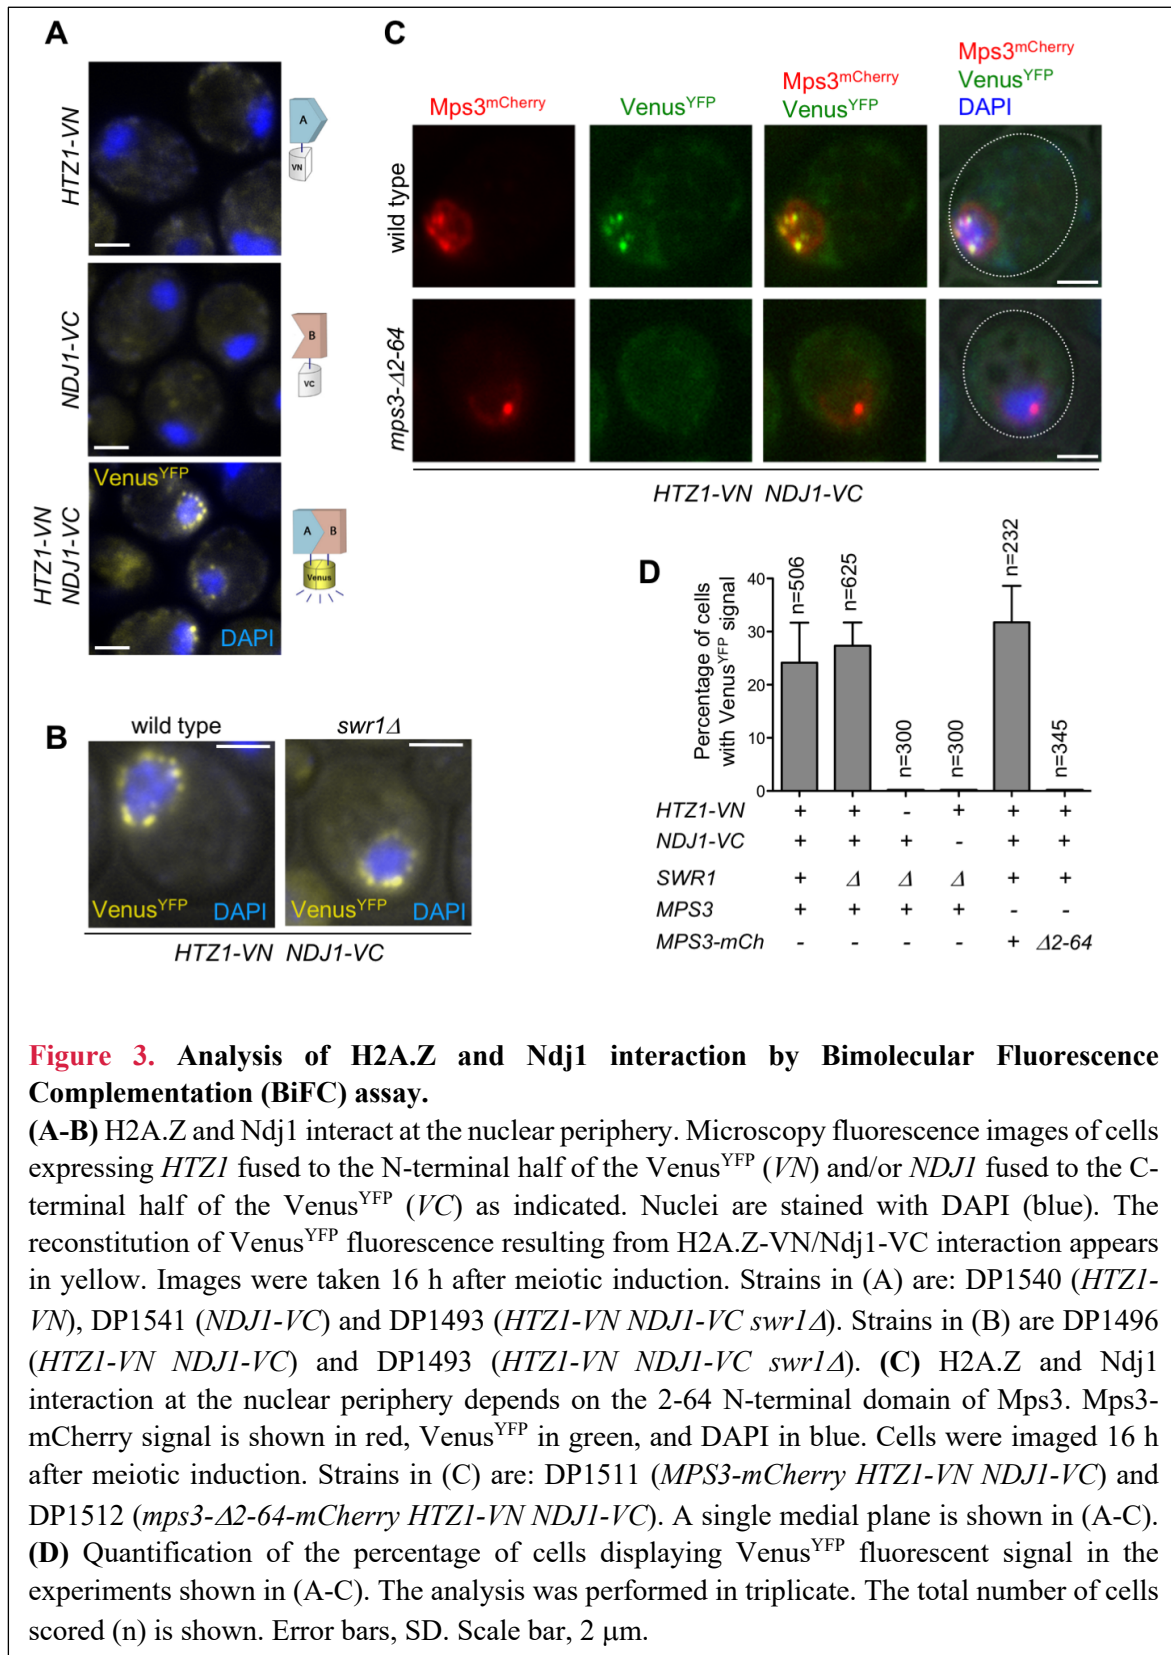

## 366 **Telomeric localization of H2A.Z depends on LINC functional integrity**

367 We next examined H2A.Z localization in mutants that compromise LINC-dependent  
368 telomere attachment to the NE, such as *mps3-Δ2-64* and *ndj1Δ*. The *mps3-Δ2-64* mutant lacks  
369 the 2-64 amino acids of Mps3 N-terminal domain. In the wild-type Mps3 protein this region  
370 protrudes into the nuclear inside serving as telomeric docking site via the Ndj1 protein (Conrad  
371 et al., 2007); therefore, in both *mps3-Δ2-64* and *ndj1Δ* mutants, telomere anchoring to the NE  
372 is impaired (Figure 4, left panels). We carried out this analysis in a *swr1Δ* mutant to get rid of  
373 the massive deposition of H2A.Z throughout chromatin enabling us to detect its telomeric  
374 localization. We found that the localization of H2A.Z at telomeres was lost in *swr1Δ mps3-Δ2-*  
375 *64* and *swr1Δ ndj1Δ* spread pachytene nuclei (Figure 4). Moreover, the H2A.Z-Ndj1 interaction  
376 detected by BiFC was abolished in the *mps3Δ2-64* mutant (Figure 3C, 3D), further supporting  
377 the notion that H2A.Z is recruited to an intact LINC complex. Of note, the presence of H2A.Z  
378 in the nucleolar vicinity observed in *swr1Δ* was maintained in the *swr1Δ mps3-Δ2-64* and  
379 *swr1Δ ndj1Δ* double mutants (Figure 4, arrowheads). Likewise, a strong H2A.Z focus not  
380 associated with the chromosomes that likely corresponds to the SPB (see below) was also  
381 detected (Figure 4, yellow arrows). Thus, these observations suggest that the association of  
382 H2A.Z to the telomeric regions specifically requires functional anchoring of the chromosomes  
383 to the NE mediated by the inner components of LINC.

384

## 385 **H2A.Z also colocalizes with Ndj1 and Mps3 at the SPB during meiosis**

386 Several studies have shown that, in addition to telomeres, Mps3 and Ndj1 are also  
387 localized at the SPB in meiotic cells (Li et al., 2015; Rao et al., 2011). Since we have observed  
388 colocalization and interaction between H2A.Z and Mps3/Ndj1 at telomeres, we examined  
389 whether H2A.Z is also targeted to the SPB. In *swr1Δ* live meiotic cells, we observed that one  
390 of the peripheral spots of H2A.Z-GFP colocalized with the SPB core component Cnm67-  
391 mCherry (Figure 5A). Moreover, BiFC analysis revealed that one of the DAPI-surrounding foci  
392 where H2A.Z and Ndj1 interact corresponds to the SPB, as shown by colocalization of the  
393 Venus<sup>YFP</sup> signal with Spc110, another SPB component, tagged with RedStar2 (Figure 5B).  
394 Immunofluorescence of spread meiotic chromosomes also showed colocalization between  
395 Cnm67 and H2A.Z at a defined focus (Figure 5C). However, in contrast to the telomeric  
396 localization of H2A.Z (Figure 4), the presence of H2A.Z at the SPB was maintained in *mps3Δ2-*  
397 *64* and *ndj1Δ* mutants during meiotic prophase, as manifested by the detection of a single  
398 H2A.Z focus associated to the characteristic monopolar prophase I spindle stained with tubulin  
399 antibodies (Figure S4). Thus, like in telomeres, our results suggest that Mps3, Ndj1 and H2A.Z



400 also interact at the SPB, but our findings reflect differential requirements for targeting H2A.Z  
 401 to the various subcellular locations.

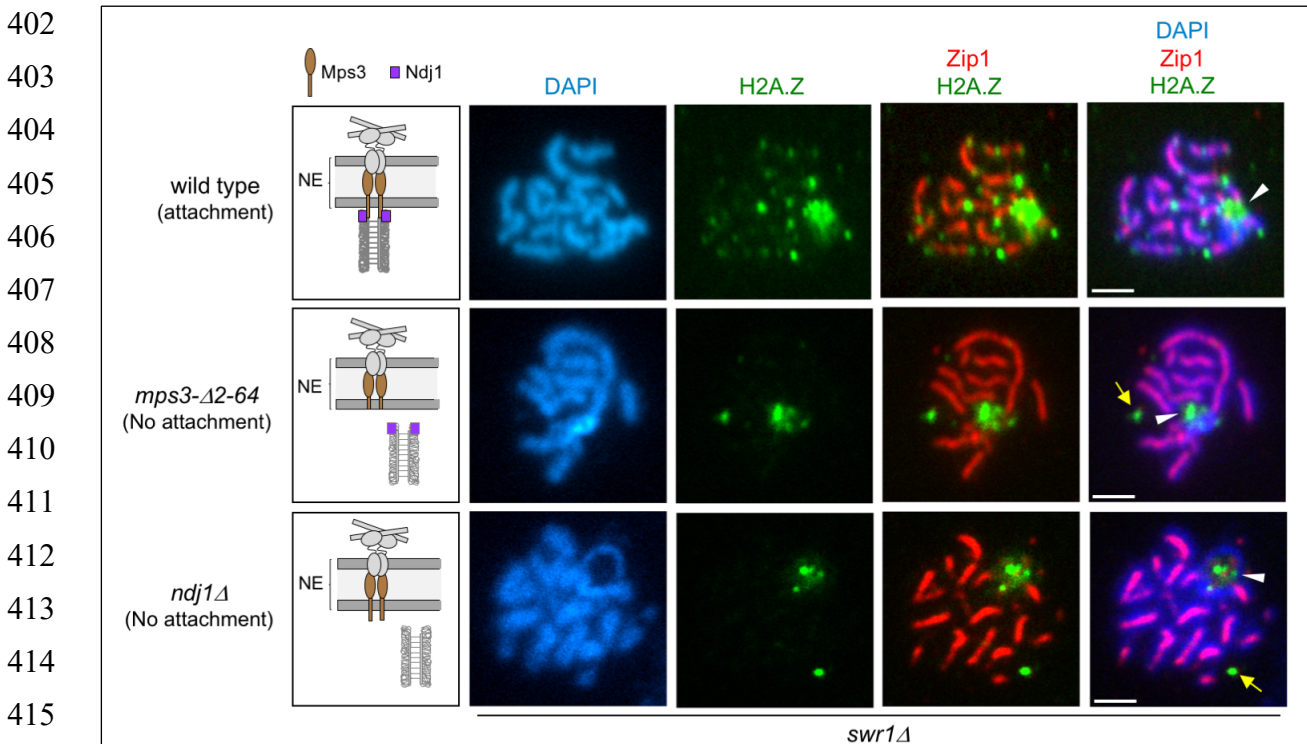

**Figure 4. H2A.Z localization at chromosome ends requires telomere attachment to the NE.**

417 Immunofluorescence of spread pachytene nuclei from the *swr1Δ* mutant stained with DAPI to  
 418 visualize chromatin (blue), anti-GFP to detect H2A.Z (green), and anti-Zip1 to mark the SC central  
 419 region (red). White arrowheads mark the rDNA region lacking Zip1. Yellow arrows point to H2A.Z  
 420 foci likely corresponding to the SPB (see text). The cartoons at the left schematize the LINC complex  
 421 and the status of telomeric attachment in the different situations analyzed. Scale bar, 2  $\mu$ m. Strains  
 422 are DP1182 (wild type), DP1280 (*mps3-Δ2-64*) and DP1305 (*ndj1Δ*). 26, 28 and 24 nuclei were  
 423 examined for wild type, *mps3-Δ2-64* and *ndj1Δ*, respectively.

## 424 H2A.Z localizes to the SPB half bridge

425 To determine the precise localization of H2A.Z within the SPB structure during meiotic  
 426 prophase, we used Structured Illumination Microscopy (SIM). We examined the colocalization  
 427 of H2A.Z-GFP, as well as Mps3-GFP for comparison, with the Spc110-mCherry protein, a  
 428 component of the SPB inner plaque (Figure 5D). We focused on prophase cells containing  
 429 duplicated unseparated SPBs. The old and new SPBs could be distinguished by the stronger  
 430 and weaker Spc110-mCherry signal, respectively (Burns et al., 2015). Most of the H2A.Z-GFP  
 431 signal concentrated in the area in between both SPBs that corresponds to the half bridge, and  
 432 only a limited overlap with the SPBs was observed (Figure 5E, left graph). Like H2A.Z, Mps3-  
 433 GFP was also detected in the half bridge, but also displayed more extensive colocalization with  
 434 Spc110-mCherry (Figure 5E, right graph), consistent with the idea that Mps3 is a dual

435 component of the bridge and the membrane domain that surrounds the SPB core (Chen et al.  
 436 2019). Thus, we conclude that the fraction of H2A.Z present in the SPB mainly localizes to the  
 437 half bridge structure that tethers duplicated SPBs during meiotic prophase I.

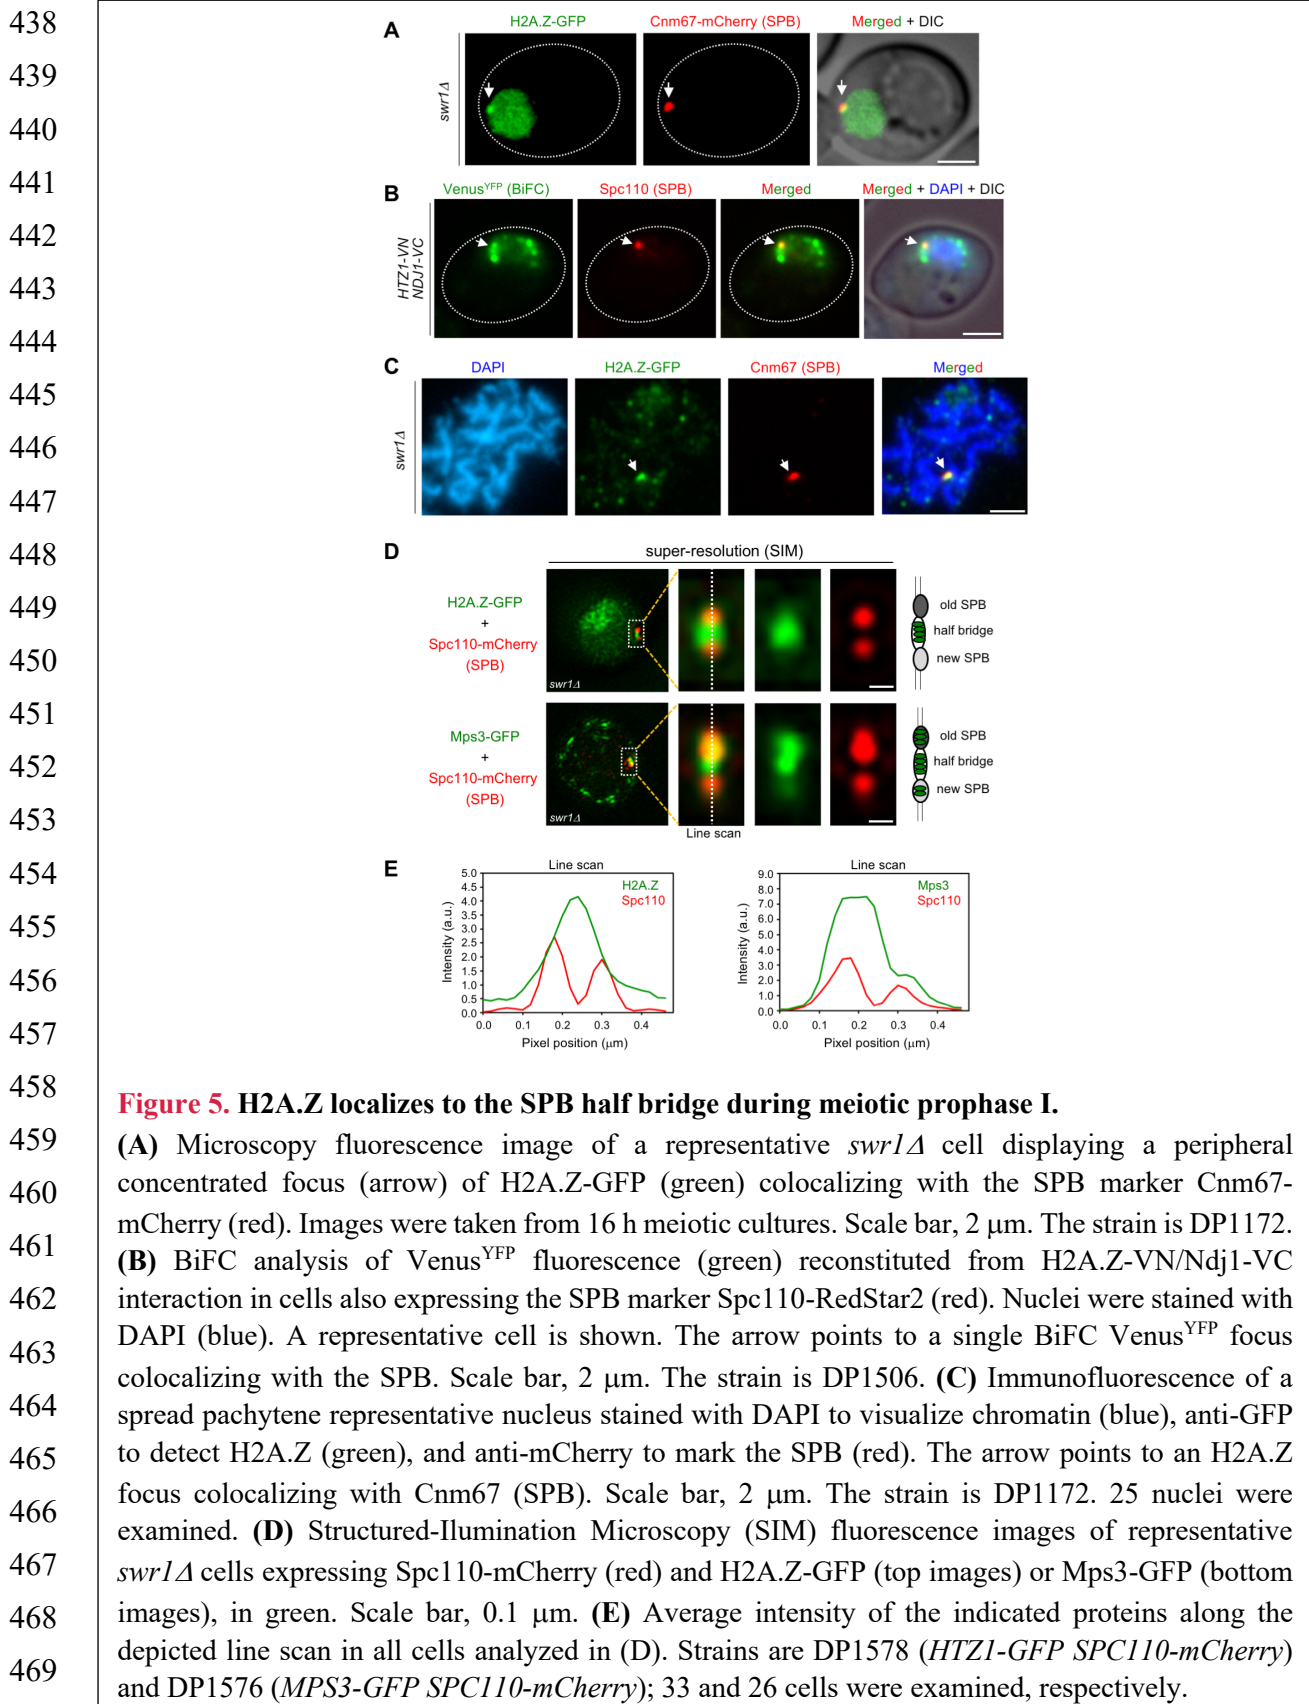

## 470 **Altered distribution of Mps3 along the NE in the absence of H2A.Z**

471 To further explore the meiotic relationship between Mps3 and H2A.Z, we examined  
472 Mps3 levels and localization in the *htz1Δ* mutant. Western blot analysis of Mps3 production in  
473 meiotic cultures showed that the protein was heavily induced during meiotic prophase and then  
474 declined at late time points as meiosis and sporulation progresses (Figure 6A). The dynamics  
475 of Mps3 production was similar in wild type and *htz1Δ*, but global Mps3 levels were reduced  
476 in the *htz1Δ* mutant. To rule out the possibility that the reduction in the amount of Mps3 was  
477 exclusively due to an inefficient meiotic progression in *htz1Δ* (Gonzalez-Arranz et al., 2018),  
478 we measured Mps3 levels in the prophase-arrested *ndt80Δ* mutant, monitoring also Mek1  
479 production as a proxy for a meiotic prophase I protein (Ontoso et al., 2013). This analysis  
480 revealed that the lack of H2A.Z specifically affects Mps3, but not Mek1, global levels (Figure  
481 S5). By immunofluorescence of pachytene chromosome spreads, we found that Mps3 remained  
482 at telomeres in the absence of H2A.Z. However, Mps3 telomeric localization was lost in the  
483 *ndj1Δ* mutant used as control for comparison (Conrad et al., 2007) (Figure 6B). Thus, although  
484 H2A.Z telomeric localization depends on the N-terminal domain of Mps3 (see above), the  
485 anchoring of Mps3 to telomeres is independent of H2A.Z. We also examined Mps3-GFP  
486 localization in live meiotic cells. The presence of Hop1-mCherry signal was used to stage cells  
487 in prophase I (Figure 6C). Analysis of the pattern of Mps3-GFP localization in whole meiotic  
488 prophase cells revealed foci with a rather uniform distribution along the NE in the wild type. In  
489 contrast, Mps3 showed a more irregular distribution and it appeared to be more concentrated at  
490 defined NE regions at a higher frequency in the *htz1Δ* mutant (Figure 6C, 6D; Video S1). We  
491 conclude that H2A.Z is required for proper distribution of Mps3 along the NE during meiotic  
492 prophase I, but not for telomere attachment.

493

## 494 **Chromosome motion is reduced in the absence of H2A.Z**

495 One of the main meiotic functions of the LINC complex is to promote telomere-led  
496 chromosome movement during prophase I (Conrad et al., 2008; Koszul et al., 2008). Since we  
497 found that H2A.Z interacts with LINC components during meiosis we hypothesized that H2A.Z  
498 could also contribute to meiotic chromosome motion. Initially, we used strains expressing  
499 *ZIP1-GFP* to follow chromosome movement, as previously described (Scherthan et al., 2007;  
500 Sonntag Brown et al., 2011). In addition to wild-type and *htz1Δ* strains, we also analyzed the  
501 *ndj1Δ* mutant as a control for defective chromosome mobility and the *swr1Δ* mutant in which  
502 H2A.Z is not deposited into the chromatin (see above). To minimize experimental variation,  
503 we mixed wild-type and mutant cells from meiotic cultures (16 h) in the same microscopy

504 culture chamber to analyze chromosome movement in parallel. Wild-type cells could be easily  
 505 distinguished by the presence of Pma1-mCherry, a plasma membrane protein that was tagged  
 506 to mark these cells (Figure 7A). We tracked the ends of individual synapsed chromosomes and  
 507 measured the distance traveled during a defined time (Figure 7B; Video S2). We found that the  
 508 average velocity of chromosome movement was reduced in the *htz1Δ* mutant, although to a  
 509 lesser extent than in *ndj1Δ*. In contrast, the *swr1Δ* mutant was not affected (Figure 7C).

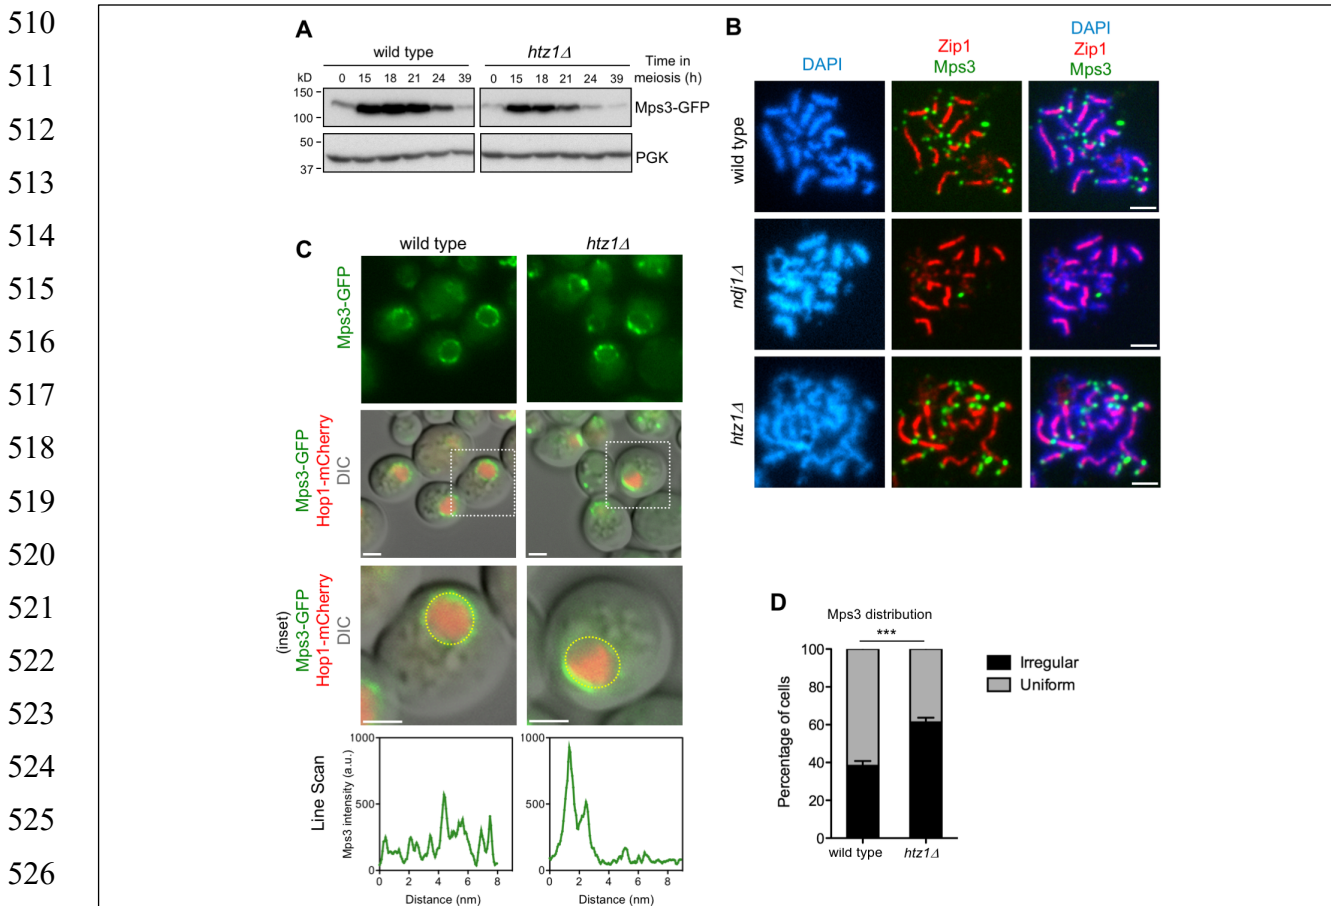

528 **Figure 6. Altered levels and distribution of Mps3 in the absence of H2A.Z.**

529 (A) Western blot analysis of Mps3 production during meiosis detected with anti-GFP antibodies. PGK  
 530 was used as a loading control. Strains in (A) are: DP866 (wild type) and DP867 (*htz1Δ*). (B)  
 531 Immunofluorescence of spread pachytene nuclei stained with DAPI to visualize chromatin (blue), anti-  
 532 GFP to detect Mps3 (green), and anti-Zip1 to mark the SC central region (red). Scale bar, 2 μm. Strains  
 533 in (B) are: DP866 (wild type), DP1103 (*ndj1Δ*) and DP867 (*htz1Δ*). (C) Microscopy fluorescence  
 534 images of cells expressing *MPS3-GFP* and *HOP1-mCherry*. The presence of Hop1-mCherry was used  
 535 to detect meiotic prophase cells. Stacks of images in the Z-axis were taken, but a single central plane  
 536 from representative cells is shown. The line scan plots represent the GFP signal along the depicted  
 537 yellow circle line in the bottom row cells. Scale bar, 2 μm. (D) The distribution of Mps3 was analyzed  
 538 in maximum-intensity projections from images obtained as in (C). Two categories were established:  
 uniform and irregular. Cells scored as “uniform” display Mps3-GFP signal homogeneously distributed.  
 Cells scored as “irregular” display Mps3-GFP signal concentrated to one area of the NE. Only cells  
 displaying Hop1-mCherry signal were considered in the analysis. This quantification was performed  
 in triplicate. A total of 383 and 387 cells were scored for wild type and *htz1Δ*, respectively. Strains in  
 (C-E) are: DP1032 (wild type) and DP1033 (*htz1Δ*).



539  
540  
541  
542  
543  
544  
545  
546  
547  
548  
549  
550  
551  
552  
553  
554  
555  
556  
557  
558  
559  
560  
561  
562  
563  
564  
565  
566  
567  
568  
569  
570  
571  
572  
573  
574  
575  
576  
577  
578  
579  
580  
581  
582  
583  
584  
585  
586  
587  
588  
589  
590

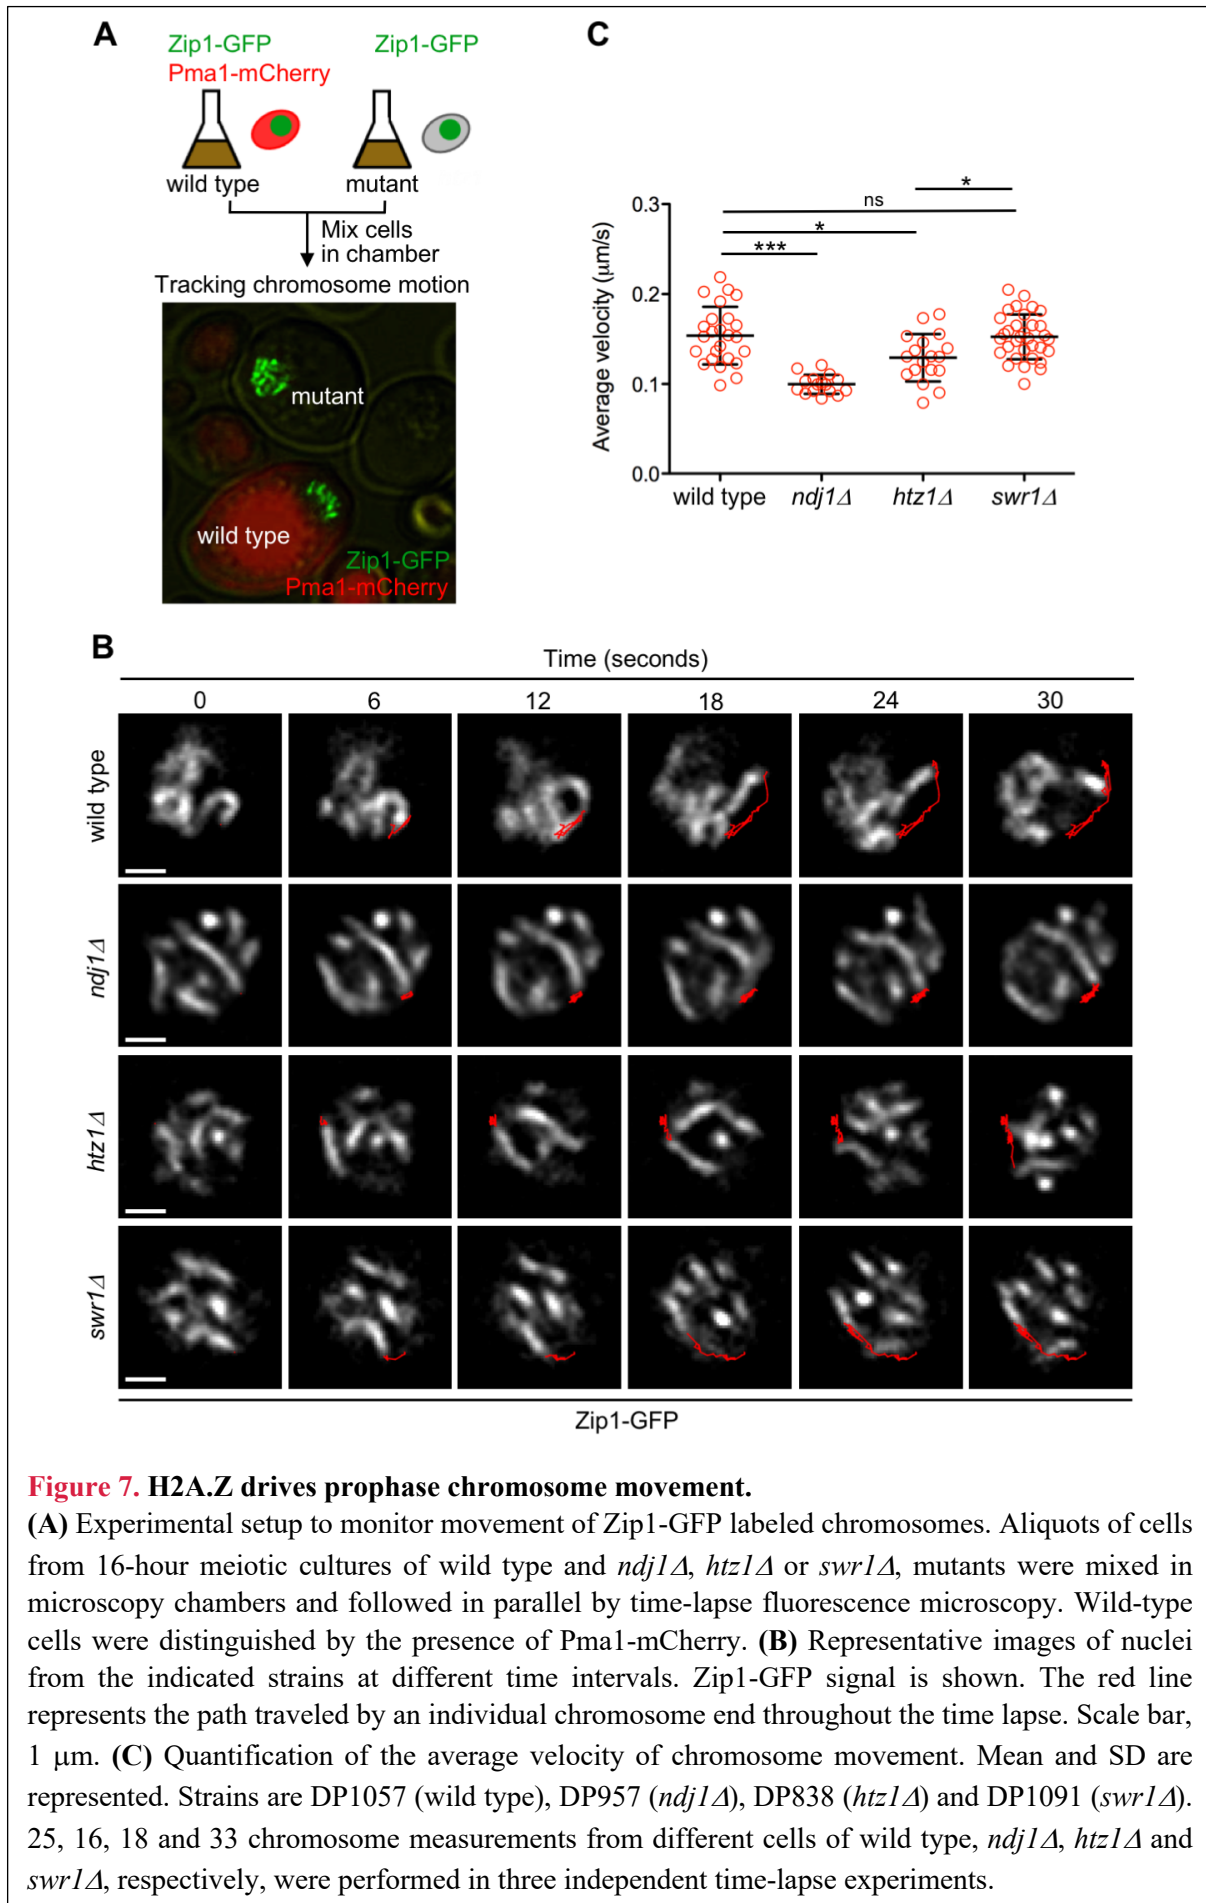

591

592 Velocity measurements based on Zip1-GFP rely on the ability to track a single  
593 chromosome pair in the maze of all synapsed chromosomes, which is not always possible.  
594 Therefore, for a more extensive and accurate analysis of telomere-driven movement we used a  
595 *tetO-tetR* system (Clemente-Blanco et al., 2011) to generate strains harboring the left telomere  
596 of chromosome IV (*TEL4L*) labeled with GFP (Figure 8A). These strains also expressed *ZIP1-*  
597 *mCherry* as a marker for prophase I stage and synapsed chromosomes (Figure 8B, 8C). In  
598 addition, we also introduced the *P<sub>CUP1</sub>-IME1* construct to increase the synchrony of the meiotic  
599 cultures (Chia and van Werven, 2016). *TEL4L* trajectory was tracked in time-lapse experiments  
600 of wild-type, *ndj1Δ*, *htz1Δ* and *swr1Δ* strains (Figure 8D; Video S3). Measurement of both  
601 average and maximum velocity of *TEL4L* movement during prophase I using this system also  
602 revealed that chromosome motion was significantly reduced in the *htz1Δ* mutant (Figure 8E,  
603 8F; Figure S6). Interestingly, consistent with the chromatin-independent interaction between  
604 H2A.Z and the LINC complex, the *swr1Δ* mutant did not display reduced mobility. As  
605 expected, the *ndj1Δ* mutant showed a dramatic reduction in *TEL4L* movement (Figure 8E, 8F;  
606 Figure S6). We conclude that H2A.Z is a novel LINC-associated component required for proper  
607 chromosome motion during meiotic prophase I.

608

## 609 DISCUSSION

610

611 The H2A.Z histone variant is involved in a myriad of biological processes, both in  
612 mitotic and meiotic cells, that rely on its chromatin incorporation at particular genomic  
613 positions where the ATP-dependent chromatin remodeler SWR1 is responsible for replacing  
614 H2A-H2B dimers to H2A.Z-H2B at nucleosomes (Billon and Cote, 2013). In this work, we  
615 characterize in detail an alternative localization of H2A.Z in different sub-compartments of  
616 meiotic cells that is independent of SWR1 and, hence, of chromatin. Indeed, our cytological  
617 studies of H2A.Z in the *swr1Δ* mutant allowed us to uncover additional locations of H2A.Z  
618 (chromosome ends and SPB) that are otherwise masked in wild-type cells due to the widespread  
619 incorporation of H2A.Z throughout chromatin. Like in mitotic cells (Raisner et al., 2005), ChIP-  
620 seq analysis of H2A.Z distribution during meiotic prophase has confirmed the absence of  
621 H2A.Z chromatin deposition throughout the genome during meiosis in the *swr1Δ* mutant; in  
622 particular, at gene promoter regions. Here, we describe chromosome movement as a novel  
623 SWR1-independent meiotic function for this histone variant.

624

625  
626  
627  
628  
629  
630  
631  
632  
633  
634  
635  
636  
637  
638  
639  
640  
641  
642  
643  
644  
645  
646  
647  
648  
649  
650  
651  
652  
653  
654  
655  
656  
657  
658  
659

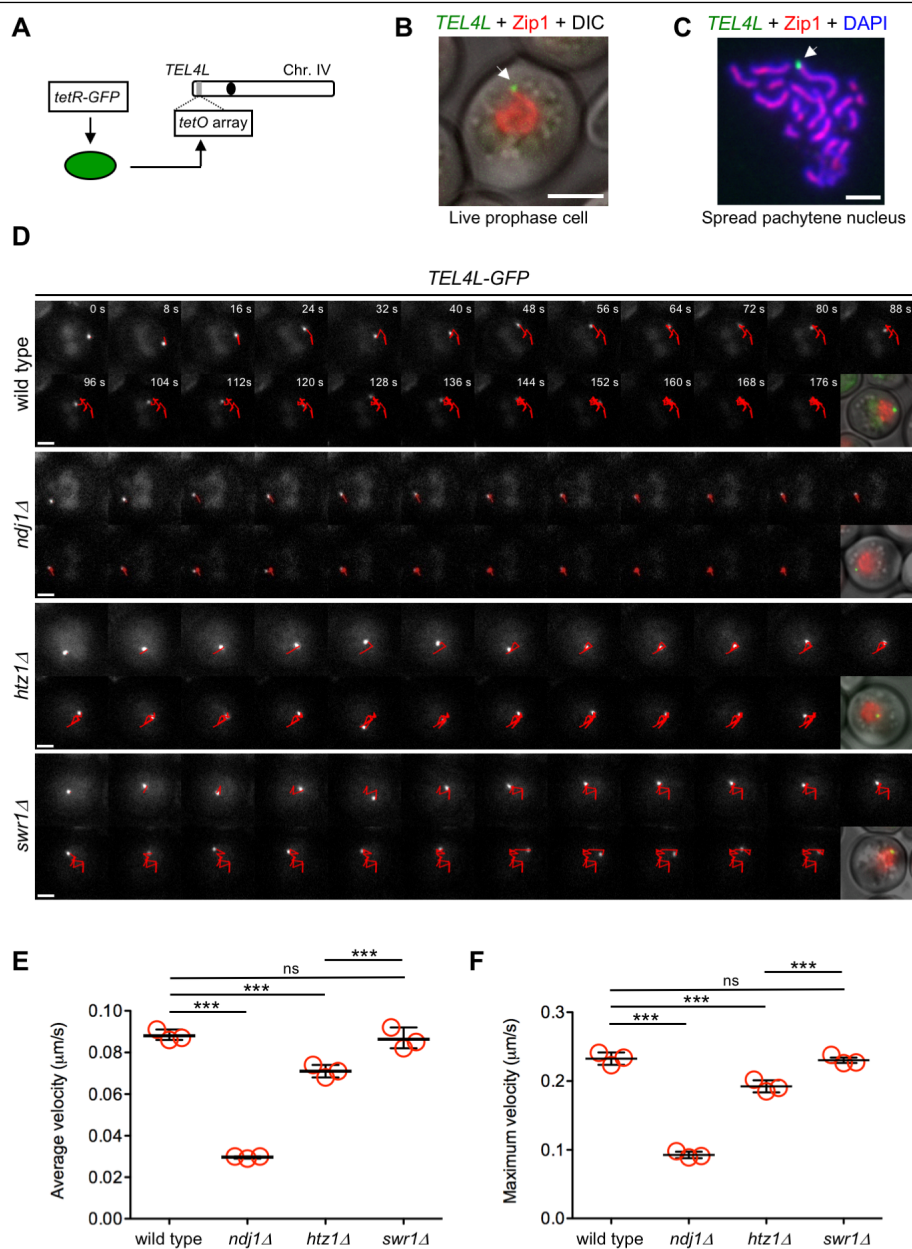

**Figure 8. H2A.Z, but not SWR1, is required for proper telomere motion during meiotic prophase.**

(A) Schematic representation of GFP tagging of the left telomere of chromosome IV (*TEL4L*). (B) Representative image of a live prophase cell expressing *ZIP1-mCherry* (red) with *TEL4L* (arrow) labeled with GFP (green). Scale bar, 2  $\mu\text{m}$ . (C) Representative image of a spread pachytene nucleus stained with anti-*Zip1* (red), anti-GFP (*TEL4L*; green) and DAPI (blue). Arrow points to *TEL4L*. Scale bar, 2  $\mu\text{m}$ . (D) Representative time-lapse fluorescence images of *TEL4L-GFP* at different time intervals (expressed in seconds at the top panels). The red line depicts the path traveled by *TEL4L-GFP* throughout the time lapse. A merge image of DIC, *Zip1-mCherry* (red) and *TEL4L-GFP* (green) is shown after the last frame. Scale bar, 2  $\mu\text{m}$ . (E) Quantification of average velocity of *TEL4L* movement. (F) Quantification of maximum velocity of *TEL4L* movement. In (E) and (F), the mean values from three independent experiments are plotted in the graphs. Data from each individual experiment and all multiple statistical comparisons are presented in Figure S6. A total of 101, 146, 172 and 139 measurements of *TEL4L* velocity from wild type, *ndj1Δ*, *htz1Δ* and *swr1Δ*, respectively, were performed in the three independent time-lapse experiments. Strains used in (D-F) are DP1692 (wild type), DP1722 (*ndj1Δ*), DP1693 (*htz1Δ*) and DP1694 (*swr1Δ*).

660 Prompted by our cytological analysis of H2A.Z in the *swr1Δ* mutant during meiotic  
661 prophase revealing a telomeric localization and by an earlier report describing the interaction  
662 between H2A.Z and Mps3 in vegetative cells (Gardner et al., 2011), we explored the  
663 relationship of H2A.Z with LINC components and LINC-associated components, such as the  
664 SUN-domain protein Mps3 and the meiosis-specific telomeric protein Ndj1, respectively. The  
665 colocalization of H2A.Z with Mps3 at meiotic telomeres and the physical interaction between  
666 H2A.Z and both Mps3 and Ndj1, particularly at the NE, strongly suggests that H2A.Z is an  
667 additional LINC-associated factor (Figure 1A). It has been proposed that H2A.Z may contribute  
668 to the nuclear trafficking of Mps3 in mitotic cells (Gardner et al., 2011); however, we found  
669 that Mps3 is still detectable at chromosome ends in the *htz1Δ* mutant, indicating that Mps3 does  
670 not require H2A.Z to be delivered to the NE in meiotic cells. Since Mps3 is embedded in the  
671 NE, its detection on nuclear spread preparations depends on the attachment of the N-terminal  
672 domain to the telomeres via Ndj1 (Conrad et al., 2007). The fact that Mps3 telomeric  
673 localization is maintained in the *htz1Δ* mutant also indicates that telomere attachment is not  
674 disrupted in the absence of H2A.Z. Nevertheless, we found that the distribution of Mps3  
675 throughout the NE is altered in the *htz1Δ* mutant that often displays an aberrant confinement of  
676 Mps3 towards one side of the nucleus. Thus, unlike mitotic cells, Mps3 does not require H2A.Z  
677 to reach the NE during meiosis, but H2A.Z is required to sustain homogenous distribution of  
678 Mps3 along the NE. This accumulation of Mps3 observed in *htz1Δ* is reminiscent of the  
679 transient meiotic bouquet (Trelles-Sticken et al., 1999), suggesting that H2A.Z may facilitate  
680 the dispersion of telomeres after the bouquet-like stage. The telomeric colocalization and the  
681 physical interaction between H2A.Z and Mps3/Ndj1 strongly suggest that H2A.Z directly  
682 impinges on LINC dynamics.

683 We found that disruption of telomere attachment, either by deleting *NDJ1* or eliminating  
684 the 2-64 amino acids of the Mps3 N-terminal domain, prevents localization of H2A.Z to  
685 chromosome ends. This observation suggests that although H2A.Z is not necessary to anchor  
686 the telomeres to the NE, it may reinforce the tethering to support robust chromosome  
687 movement. A similar scenario has been described in the *mps3-dCC* mutant lacking a fragment  
688 of an internal domain of Mps3 located in the lumen of the NE. Like in *htz1Δ*, telomeric  
689 attachment is maintained in *mps3-dCC*, but chromosome movement is mildly affected (Lee et  
690 al., 2012). Consistent with this notion, the reduction in chromosome velocity detected in *htz1Δ*  
691 is not as dramatic as in the *ndj1Δ* mutant where telomere attachment via Mps3 is lost (Conrad  
692 et al., 2007). Incorporation of H2A.Z into nucleosomes produces changes in chromatin rigidity  
693 (Gerhold et al., 2015; Neumann et al., 2012); thus, it is formally possible that the reduced



694 mobility of *htz1Δ* chromosomes could stem from altered chromatin compaction preventing  
695 proper transmission of the forces generated by the actin cytoskeleton to the chromosomes.  
696 However, the *swr1Δ* mutant shows no defect in chromosome movement indicating that  
697 chromatin deposition of H2A.Z has little impact on this phenomenon. In fact, the interaction  
698 between Mps3 and H2A.Z, and between Ndj1 and H2A.Z, persists in the absence of SWR1  
699 both in mitotic (Gardner et al., 2011) and meiotic cells (this work). We hypothesize that the  
700 irregular accumulation of Mps3 at certain areas of the NE detected in *htz1Δ* cells may interfere  
701 with proper telomere-led movement. The involvement of H2A.Z in chromatin movement has  
702 been reported also in mitotic cells where H2A.Z promotes the recruitment of unrepairable DSBs  
703 to the NE by Mps3 anchoring (Horigome et al., 2014; Kalocsay et al., 2009). However, this  
704 nuclear relocalization relies on SWR1-dependent chromatin deposition of H2A.Z, suggesting  
705 that different mechanisms are involved.

706 Certain histone post-translational modifications, such as Set1-mediated H3K4  
707 methylation have been shown to be involved in bouquet formation and telomere redistribution  
708 throughout the NE (Trelles-Sticken et al., 2005). Like H2A.Z, Set1 is also involved in the  
709 regulation of the so-called telomere-position effect (TPE) (Krogan et al., 2002; Martins-Taylor  
710 et al., 2011; Meneghini et al., 2003). However, the contribution of Set1 and H2A.Z to meiotic  
711 nuclear dynamics likely derives from different mechanisms. First, we show here that, unlike  
712 TPE (Kobor et al., 2004; Krogan et al., 2003; Mizuguchi et al., 2004), the interaction of H2A.Z  
713 with the LINC complex and its role in promoting chromosome movement does not require its  
714 SWR1-dependent chromatin incorporation. Second, the telomere dispersion defect of *set1Δ*  
715 mutants appears to be independent of Ndj1 (Trelles-Sticken et al., 2005).

716 In addition to the telomeric localization, we also describe here the presence of H2A.Z  
717 in another cellular structure devoid of chromatin, the SPB, in particular, the half bridge where  
718 Mps3 is also located. However, the targeting of H2A.Z to the SPB presents different  
719 requirements because, unlike its telomeric localization, it does not require Ndj1 or the 2-64  
720 amino acids of the Mps3 N-terminal domain. Notably, we detect interaction between H2A.Z  
721 and Ndj1 in the wild type (Figure 5B), but not in the *mps3Δ2-64* mutant (Figure 3C) consistent  
722 with the observation that Ndj1 requires the N-terminal domain of Mps3 for SPB recruitment  
723 (Li et al., 2015). What could be the function of H2A.Z at the SPB? During meiotic prophase I,  
724 Ndj1, which is recruited to the SPB by Mps3, protects the cohesion between duplicated SPBs  
725 (Li et al., 2015). Phosphorylation of Mps3 at S70 promotes the proteolytic cleavage of the  
726 protein enabling irreversible separation of sister SPBs (Li et al., 2017). We speculate that the  
727 presence of H2A.Z at the SPB at the same time and location as Mps3 and Ndj1 may be

728 indicative of a role for H2A.Z in SPB dynamics; future experiments will address this question.  
729 The fact that Mps3, Ndj1 and, as described here, also H2A.Z, colocalize and interact both at  
730 telomeres and SPB is consistent with a number of observations indicating that proper nuclear  
731 architecture and LINC-mediated contacts between chromosomes and the NE are important to  
732 coordinate interhomolog interactions with subsequent chromosome segregation. In *S. pombe*,  
733 multiple lines of evidence support this coordination (Fennell et al., 2015; Fernandez-Alvarez et  
734 al., 2016; Katsumata et al., 2016; Tomita and Cooper, 2007).

735 In sum, we describe here a novel role for H2A.Z in telomere-led meiotic chromosome  
736 motion that is independent of its deposition on chromatin by SWR1. The budding yeast *htz1Δ*  
737 mutant displays various meiotic phenotypes including slower meiotic progression and reduced  
738 viability of meiotic products. Interestingly, although the *swr1Δ* mutant also shows meiotic  
739 defects, these phenotypes are less severe in *swr1Δ* compared to *htz1Δ*. Indeed, spore viability  
740 is 95% in the wild type, 76% in *htz1Δ* and 88% in *swr1Δ* (Gonzalez-Arranz et al., 2018),  
741 consistent with the notion that H2A.Z possesses additional meiotic roles unrelated to SWR1,  
742 namely chromosome motion. Thus, we propose that, at least in budding yeast, H2A.Z performs  
743 both chromatin-dependent and chromatin-independent functions all of them contributing to  
744 sustain accurate gametogenesis. Cytological analyses of H2A.Z localization in mice  
745 spermatocytes have revealed a dynamic spatiotemporal localization of this histone variant on  
746 different euchromatin and heterochromatin domains (sex body) suggestive of a functional  
747 impact on mammalian meiosis (Greaves et al., 2006; Ontoso et al., 2014). In the future, it will  
748 be interesting to determine whether the chromatin-independent function of H2A.Z is also  
749 evolutionarily conserved.

750

## 751 MATERIALS AND METHODS

752

### 753 Yeast strains

754 Yeast strain genotypes are listed in **Table S1**. All the strains are isogenic to the BR1919  
755 background (Rockmill and Roeder, 1990). The *swr1::natMX4*, *swr1::hphMX4*, *ndj1::natMX4*,  
756 *ndj1::kanMX6*, *htz1::natMX4*, *mps3::natMX4* and *mps3::hphMX4* gene deletions were made  
757 using a PCR-based approach (Goldstein and McCusker, 1999; Longtine et al., 1998). The  
758 *htz1::URA3* deletion and the functional *HTZ1-GFP* construct were previously described  
759 (Gonzalez-Arranz et al., 2018). The *MPS3-GFP*, *MPS3-3HA*, *NET1-RedStar2*, *SPC110-*  
760 *RedStar2*, *SPC110-mCherry*, *CNM67-mCherry*, *HOP1-mCherry* and *PMA1-mCherry* gene  
761 tagging constructs were also made by PCR (Janke et al., 2004; Longtine et al., 1998; Sheff and  
762 Thorn, 2004). To generate *P<sub>CUP1</sub>-IME1* strains, the 1760 bp promoter region of *IME1*, including

763 the *IRT1* lcrRNA (Chia and van Werven, 2016), was replaced by the *CUP1* promoter amplified  
764 from pYM-N1 (Janke et al., 2004). Strains producing a version of Mps3 lacking amino acids  
765 2-64 of the N-terminal domain were created as follows. One allele of the essential *MPS3* gene  
766 was deleted in a diploid strain. The heterozygous *MPS3/mps3-hphMX4* diploid was transformed  
767 with the *URA3*-based pSS326 centromeric plasmid harboring *mps3 $\Delta$ 2-64*. 5-Fluoroorotic acid  
768 (FOA)-resistant and hygromycin-resistant spores were selected and further checked for the  
769 presence of *mps3 $\Delta$ 2-64* expressed from pSS326 as the only source of this protein in the cells.  
770 As a control, the same procedure was followed using the pSS269 plasmid expressing wild-type  
771 *MPS3*. The *HTZI-VN* and *NDJI-VC* strains used in the Bimolecular Fluorescence  
772 Complementation (BiFC) assay were constructed using the plasmids pFA6a-VN-TRP1 and  
773 pFA6a-VC-kanMX6 containing the N-terminal (VN) or C-terminal fragment (VC) of the  
774 Venus variant of yellow fluorescent protein (Sung and Huh, 2007). Strains carrying Tel4L  
775 marked with GFP were generated as follows. First, the *tetR-GFP* construct was integrated at  
776 *leu2* by transforming with the *AflIII*-digested pSS329 plasmid. Second, the *tetO(50)* array was  
777 inserted into a region close to the left telomere of chromosome IV (Tel4L) by transforming with  
778 the pSS330 plasmid cut with *AflIII*. Strains producing *ZIP1* tagged with mCherry at position 700  
779 were constructed using the *delitto perfetto* approach (Stuckey and Storicci, 2013). Basically, a  
780 fragment containing *mCherry* flanked by 60-nt *ZIP1* sequences upstream and downstream of  
781 the codon for amino acid 700 was obtained by PCR from plasmid pSS266. This fragment was  
782 transformed into a strain carrying the CORE cassette (*URA3-kanMX4*) inserted at the position  
783 corresponding to amino acid 700 of the *ZIP1* gene. FOA-resistant and G418-sensitive  
784 transformants were obtained and correct clones were selected.

785 All constructs and mutations were verified by PCR analysis and/or DNA sequencing.  
786 The sequences of all primers used in strain construction are available upon request. All strains  
787 were made by direct transformation of haploid parents or by genetic crosses always in an  
788 isogenic background. Diploids were made by mating the corresponding haploid parents and  
789 isolation of zygotes by micromanipulation.

790

## 791 **Plasmids**

792 The plasmids used in this work are listed in **Table S2**. To generate pSS266, a PCR  
793 fragment containing 468 nt of the *MPS3* promoter, the *MPS3-mCherry* C-terminal fusion and  
794 the *ADHI* terminator was amplified from genomic DNA of a strain harboring the *MPS3-*  
795 *mCherry* construct and blunt-cloned into the pJET2.1 vector (ThermoFisher). A *BglIII*-*BglIII*  
796 fragment from pSS266 containing *MPS3-mCherry* was then cloned into *Bam*HI of pRS424 to  
797 generate pSS267. Then, a 3.5-kb *XhoI*-*NotI* fragment from pSS267 containing *MPS3-mCherry*

798 was cloned into the same sites of the centromeric vector pRS316 to generate pSS269. A version  
799 of *MPS3-mCherry* lacking the sequences encoding amino acids 2-64 of the N-terminal domain  
800 (*mps3 $\Delta$ 2-64*) was made by site-directed mutagenesis of pSS269 using divergent  
801 oligonucleotides flanking the region to be deleted to generate plasmid pSS326. The pSS329  
802 plasmid contains the *tet* repressor fused to *NLS-GFP* and expressed from the *URA3* promoter  
803 (Michaelis et al., 1997). *EcoRI* or *AflIII* digestion of pSS329 targets TetR-GFP at *leu2*. The  
804 pSS330 plasmid harbors an approximately 5.4-kb array with 50 tandem repeats of the *tetO*  
805 operator inserted between the *HXT15* and *THI13* genes located close to *TEL4L* cloned into  
806 *BamHI-XbaI* of pRS406.

807

### 808 **Meiotic cultures and synchronous sporulation of BR strains**

809 To induce meiosis and sporulation, BR strains were grown in 3.5 ml of 2X Synthetic  
810 Complete medium (2% glucose, 0.7% yeast nitrogen base without amino acids, 0.05% adenine,  
811 and complete supplement mixture from Formedium at twice the particular concentration  
812 indicated by the manufacturer) for 20–24 h, then transferred to 2.5 ml of YPDA (1% yeast  
813 extract, 2% peptone, 2% glucose, 0.02% adenine) and incubated to saturation for additional 8  
814 hr. Cells were harvested, washed with 2% potassium acetate (KAc), resuspended into 2% KAc  
815 (10 ml), and incubated at 30°C with vigorous shaking to induce meiosis. Both YPDA and 2%  
816 KAc were supplemented with 20 mM adenine and 10 mM uracil. The culture volumes were  
817 scaled up when needed.

818 To increase synchrony in the meiotic cultures for Tel4L-GFP tracking, BR strains  
819 containing *P<sub>CUP1</sub>-IME1* were used. Culture conditions during pre-sporulation were similar as  
820 described above, except that YPDA contained 1% glucose. Cells were transferred to 2% KAc  
821 and, after 12 h, CuSO<sub>4</sub> was added at a final concentration of 50  $\mu$ M to induce *IME1* expression  
822 and drive meiotic entry. Cells were imaged 6 h after *IME1* induction, when approximately 73%  
823 of cells in the culture contained linear stretches of Zip1-mCherry.

824

### 825 **Western blotting and immunoprecipitation**

826 Total cell extracts for western blot analysis in Figure 6A and Figure S5 were prepared  
827 by TCA precipitation from 5-ml aliquots of sporulation cultures as previously described  
828 (Acosta et al., 2011). The antibodies used are listed in Table S3. The ECL, ECL2 or SuperSignal  
829 West Femto reagents (ThermoFisher Scientific) were used for detection. The signal was  
830 captured on films and/or with a ChemiDoc XRS system (Bio-Rad).

831 For co-immunoprecipitation experiments, cells from 200 ml of meiotic cultures (16 h  
832 after meiotic induction) were harvested and washed with extraction buffer (20 mM HEPES-

833 NaOH pH 7.5, 300 mM NaCl, 1mM EDTA, 5 mM EGTA, 50 mM NaF, 50 mM  $\beta$ -  
834 glycerophosphate, 1mM DTT, 1mM PMSF) containing one tablet of EDTA-free Complete  
835 Protease Inhibitors (Roche). The cell pellet was frozen in liquid nitrogen and ground with a  
836 freezer mill (6775 Freezer Mill). Ground cell powder was allowed to thaw on ice and then  
837 resuspended in 9 ml of lysis buffer (extraction buffer plus 0.5% Triton X-100). After  
838 homogenization with a homogenizer (ultra-turrax T10 basic, IKA) for 30 s, lysates were  
839 centrifuged at 3000 x g for 10 min at 4°C, and the resulting supernatant was used for  
840 immunoprecipitation saving 100  $\mu$ l for input analysis. 50  $\mu$ l of GFP-Trap magnetic agarose  
841 (Chromotek) were added to the remaining lysate to immunoprecipitate GFP-tagged proteins.  
842 After 3h incubation with rotation at 4°C, beads were washed five times with extraction buffer  
843 and the bound proteins were eluted by boiling in 2X Laemmli buffer. Samples from both input  
844 lysates and immunoprecipitates were analyzed by SDS-PAGE followed by western blotting.

845

#### 846 **Chromatin immunoprecipitation and Illumina sequencing**

847 At the 0 and 15 hour time points, 7 mL meiotic cultures (OD<sub>600</sub> ~6-7) were harvested  
848 and fixed for 30 min with 1% formaldehyde. The crosslinking reaction was quenched by the  
849 addition of 125mM glycine. Chromatin immunoprecipitation was performed as described  
850 (Blitzblau et al., 2012). Samples were immunoprecipitated with 3  $\mu$ L polyclonal rabbit anti-  
851 GFP serum per IP. Library quality was confirmed by Qubit HS assay kit and 2200 TapeStation.  
852 51-bp single-end sequencing was accomplished on an Illumina HiSeq 2500 instrument.

853

#### 854 **Processing Illumina data**

855 Sequencing reads were mapped to a high-quality assembly of S288C (Yue et al., 2017)  
856 using Bowtie (Langmead et al., 2009). Reads with up to 2 mismatches across all 51bp were  
857 considered during mapping, and reads with more than one reportable alignment were mapped  
858 to the best position. Reads were also mapped to the SK1 genome with similar results. Reads  
859 were extended towards 3' ends to a final length of 200 bp using MACS-2.1.0  
860 (<https://github.com/taoliu/MACS>) (Zhang et al., 2008) All pileups were SPMR-normalized  
861 (signal per million reads) and fold-enrichment of the ChIP data over the input data was  
862 calculated. The 95% confidence intervals were calculated by bootstrap resampling from the  
863 data 1000 times with replacement. Datasets are available at GEO with accession number  
864 GSE153003.

865

#### 866 **Fluorescence microscopy**



867 Immunofluorescence of chromosome spreads was performed essentially as described  
868 (Rockmill, 2009). The antibodies used are listed in **Table S3**. Images of spreads and fixed whole  
869 cells were captured with a Nikon Eclipse 90i fluorescence microscope controlled with  
870 MetaMorph software and equipped with a Hamamatsu Orca-AG CCD camera and a PlanApo  
871 VC 100x 1.4 NA objective. The following exposure times were used: DAPI (400 msec), Mps3-  
872 GFP/Mps3-HA (500 msec), Cnm67-mCherry (200 msec), tubulin (10 msec) and H2A.Z-GFP  
873 (500 msec in wild type and 2000 msec in *swr1*).

874 For BiFC analysis, cells were fixed with 3.7% formaldehyde for 10 minutes at 30°C  
875 with 500 rpm shaking. Cells were washed with 1X PBS, permeabilized for 10 minutes with  
876 70% ethanol and stained with 1 µg/ml DAPI for 10 minutes. Images were captured with the  
877 Nikon Eclipse 90i fluorescence microscope described above, with the following exposure  
878 times: DAPI (400 msec), Venus<sup>YFP</sup> (5000 msec), Mps3-mCherry (1000 msec), Spc110-  
879 RedStar2 (1000 msec) and DIC (10 msec).

880 For analysis of Mps3-GFP distribution, cells were fixed with 3.7 % formaldehyde and  
881 washed with 1X PBS. Stacks of 30 planes at 0.2 µm intervals were captured for Mps3-GFP  
882 (300 msec exposure). Also, a DIC image (25 msec), and single-plane image of Hop1-mCherry  
883 (600 msec exposure), to identify meiotic prophase cells, were captured. Maximum intensity  
884 projections were generated using Fiji software (<https://imagej.net/Fiji>). Images were captured  
885 with an Olympus IX71 fluorescence microscope equipped with a personal DeltaVision system,  
886 a CoolSnap HQ2 (Photometrics) camera, and a 100x UPLSAPO 1.4 NA objective.

887 For colocalization of H2A.Z-GFP (400 msec exposure) and Mps3-MCherry (800 msec),  
888 Cnm67-mCherry (1000 msec) or Net1-RedStar2 (1000 msec) in live meiotic cells, z-stacks of  
889 25 planes at 0.2 µm intervals were consecutively captured using the DeltaVision microscope  
890 described above. Images were deconvolved using the SoftWoRx 5.0 software (Applied  
891 Precisions).

892 For super-resolution analysis (SIM) of Mps3-GFP, H2A.Z-GFP and Spc110-mCherry,  
893 cells collected 16 h after meiotic induction were fixed for 15 min in 4% paraformaldehyde (Ted  
894 Pella) with 100 mM sucrose, and then washed two times in phosphate-buffered saline pH 7.4.  
895 Aliquots of cells were placed on cleaned slides covered with coverslips (number 1.5). Multiple  
896 color 3D-SIM images were acquired using a GE Healthcare DeltaVision OMX Blaze V3 fitted  
897 with an Olympus PlanApo N 100x 1.42 NA oil objective. Stacks of 17 planes at 0.125 µm  
898 intervals were captured (100 msec exposure for green and red channels). SIM reconstruction  
899 was performed with the Applied Precision SoftWoRx software package (GE Healthcare,  
900 Piscataway, NJ) following the Applied Precision protocols. After reconstruction, alignment  
901 between differently colored channels was performed based on calibration from alignment slide

902 provided by the manufacturer. All analysis was performed using ImageJ and custom plugins  
903 written for ImageJ (created in the microscopy center of The Stowers Institute for Medical  
904 Research) at <http://research.stowers.org/imagejplugins/index.html>).

905

### 906 **Measurement of chromosome and telomere movement**

907 For analysis of chromosome movement using Zip1-GFP tracking, cells from 16 h  
908 meiotic cultures of wild-type and mutants (*ndj1Δ*, *htz1Δ* or *swr1Δ*) were mixed in the same  
909 microscopy culture chamber ( $\mu$ -slide 8 well, Ibidi) previously treated with 0.5 mg/ml of  
910 Concanavalin A Type IV (Sigma-Aldrich). The chamber was maintained at 30°C during the  
911 experiment. Zip1-GFP images were taken during 30 sec at 0.6 sec intervals with 100 msec  
912 exposure time. To distinguish wild-type cells (expressing *PMA1-mCherry*) from mutants, red  
913 channel images were also taken (800msec). Images were deconvolved using the SoftWoRx 5.0  
914 software (Applied Precisions). Clearly isolated chromosomes in a nucleus were manually  
915 marked at the end and tracked for 50 consecutive frames. Chromosome velocities were  
916 calculated using a manual tracking plugin on ImageJ  
917 (<https://imagej.nih.gov/ij/plugins/track/track.html>). A total 16-25 chromosomes for each  
918 genotype in 4 independent experiments were analyzed.

919 For analysis of *TEL4L* movement, meiotic prophase cells from synchronous cultures (6  
920 h after induction of *IME1* with CuSO<sub>4</sub>) were placed in Concanavalin A-treated microscopy  
921 culture chambers maintained at 30°C. For *TEL4L-GFP* (200 msec exposure) and Zip1-mCherry  
922 (800 msec exposure), Z-stacks of seven planes (0.6  $\mu$ m step size) were captured at 8 sec  
923 intervals during 180 sec. A single plane of DIC was also captured in every frame. To correct  
924 for possible small displacements of the microscope stage during the time lapse, GFP images  
925 were aligned using DIC images as reference using a script provided by Giovanni Cardone  
926 (available upon request). *TEL4L-GFP* dots in the nuclei were manually marked and tracked for  
927 23 consecutive frames. Telomere movement velocities were calculated using the MTrackJ  
928 plugin of Fiji (<https://imagejscience.org/meijering/software/mtrackj/>). A total of 101-172  
929 telomere tracks from 3 different experiments were analyzed for each genotype. Images for both  
930 chromosome movement (Zip1-GFP) and telomere movement (*TEL4L-GFP*) were captured  
931 with an Olympus IX71 fluorescence microscope equipped with a personal DeltaVision system,  
932 a CoolSnap HQ2 (Photometrics) camera, and a 100x UPLSAPO 1.4 NA objective.

933

### 934 **Statistics**

935 To determine the statistical significance of differences a two-tailed Student *t*-test, for  
936 pairwise comparisons, or one-way ANOVA Tukey test, for multiple comparisons, were used.

937 *P*-Values were calculated with the GraphPad Prism 5.0 software. The nature of errors bars in  
938 graphical representations and the number of biological replicates is indicated in the  
939 corresponding figure legend.

940

## 941 **ACKNOWLEDGMENTS**

942

943 We thank Andrés Clemente and Félix Prado for useful comments and discussion, Cristina  
944 Martín, Andrés Clemente, César Roncero, Raimundo Freire and Shirleen Roeder for reagents,  
945 and Giovanni Cardone for the image alignment script. This work was supported by a grant  
946 BFU2015-65417-R from Ministry of Economy and Competitiveness (MINECO) of Spain to  
947 PSS, a grant RTI2018-099055-B-I00 from Ministry of Science, Innovation and Universities  
948 (MCIU/AEI/FEDER, UE) of Spain to PSS and JAC, the Stowers Institute for Medical Research  
949 to SLJ, a grant R01GM121443 from the National Institute of General Medical Sciences of the  
950 National Institutes of Health to SLJ, and NIH grants GM111715 and GM123035 to AH. SG-A  
951 was partially supported by the “Unidad de Excelencia de Biología Funcional y Genómica” Ref.  
952 2019/X002/05 from the University of Salamanca. The IBFG is supported in part by an  
953 institutional grant from the “Junta de Castilla y León, Ref. CLU-2017-03 co-funded by the P.O.  
954 FEDER de Castilla y León 14-20”. Original data underlying parts of this manuscript can be  
955 accessed from the Stowers Original Data Repository at  
956 <http://www.stowers.org/research/publications/LIBPB-1519>.

957

## 958 **AUTHOR CONTRIBUTIONS**

959

960 S González-Arranz: Conceptualization, investigation, formal analysis, visualization

961

962 JM Gardner: Investigation

963

964 Z Yu: Formal analysis

965

966 NJ Patel: Investigation, formal analysis

967

968 J Heldrich: Investigation, formal analysis

969

970 B Santos: Supervision, project administration

971

972 JA Carballo: Resources, funding acquisition

973

974 SL Jaspersen: Resources, funding acquisition

975

976 A Hochwagen: Resources, formal analysis, funding acquisition

977



978 PA San-Segundo: Conceptualization, investigation, supervision, funding acquisition,  
979 visualization, writing original draft

980

981 All authors revised, commented and approved the manuscript.

982

983

984 **Conflict of interest statement**

985 The authors declare no competing financial interests.

986

987 **REFERENCES**

988

989 Acosta, I., D. Ontoso, and P.A. San-Segundo. 2011. The budding yeast polo-like kinase Cdc5  
990 regulates the Ndt80 branch of the meiotic recombination checkpoint pathway. *Mol Biol Cell*.  
991 22:3478-3490.

992 Adkins, N.L., H. Niu, P. Sung, and C.L. Peterson. 2013. Nucleosome dynamics regulates DNA  
993 processing. *Nat Struct Mol Biol*. 20:836-842.

994 Billon, P., and J. Cote. 2013. Precise deposition of histone H2A.Z in chromatin for genome  
995 expression and maintenance. *Biochim Biophys Acta*. 1819:290-302.

996 Blitzblau, H.G., C.S. Chan, A. Hochwagen, and S.P. Bell. 2012. Separation of DNA replication  
997 from the assembly of break-competent meiotic chromosomes. *PLoS Genet*. 8:e1002643.

998 Bommi, J.R., H. Rao, K. Challa, M. Higashide, K. Shinmyozu, J.I. Nakayama, M. Shinohara,  
999 and A. Shinohara. 2019. Meiosis-specific cohesin component, Rec8, promotes the localization  
1000 of Mps3 SUN domain protein on the nuclear envelope. *Genes Cells*. 24:94-106.

1001 Brachet, E., V. Sommermeyer, and V. Borde. 2012. Interplay between modifications of  
1002 chromatin and meiotic recombination hotspots. *Biol Cell*. 104:51-69.

1003 Burke, B. 2018. LINC complexes as regulators of meiosis. *Curr Opin Cell Biol*. 52:22-29.

1004 Burns, S., J.S. Avena, J.R. Unruh, Z. Yu, S.E. Smith, B.D. Slaughter, M. Winey, and S.L.  
1005 Jaspersen. 2015. Structured illumination with particle averaging reveals novel roles for yeast  
1006 centrosome components during duplication. *Elife*. 4:e08586.

1007 Chang, W., H.J. Worman, and G.G. Gundersen. 2015. Accessorizing and anchoring the LINC  
1008 complex for multifunctionality. *J Cell Biol*. 208:11-22.

1009 Chen, J., J.M. Gardner, Z. Yu, S.E. Smith, S. McKinney, B.D. Slaughter, J.R. Unruh, and S.L.  
1010 Jaspersen. 2019. Yeast centrosome components form a noncanonical LINC complex at the  
1011 nuclear envelope insertion site. *J Cell Biol*. 218:1478-1490.

1012 Chia, M., and F.J. van Werven. 2016. Temporal Expression of a Master Regulator Drives  
1013 Synchronous Sporulation in Budding Yeast. *G3*. 6:3553-3560.

1014 Choi, K., X. Zhao, K.A. Kelly, O. Venn, J.D. Higgins, N.E. Yelina, T.J. Hardcastle, P.A.  
1015 Ziolkowski, G.P. Copenhaver, F.C. Franklin, G. McVean, and I.R. Henderson. 2013.  
1016 Arabidopsis meiotic crossover hot spots overlap with H2A.Z nucleosomes at gene promoters.  
1017 *Nat Genet*. 45:1327-1336.

1018 Chua, P.R., and G.S. Roeder. 1997. Tam1, a telomere-associated meiotic protein, functions in  
1019 chromosome synapsis and crossover interference. *Genes Dev*. 11:1786-1800.

1020 Clemente-Blanco, A., N. Sen, M. Mayan-Santos, M.P. Sacristan, B. Graham, A. Jarmuz, A.  
1021 Giess, E. Webb, L. Game, D. Eick, A. Bueno, M. Merckenschlager, and L. Aragon. 2011. Cdc14  
1022 phosphatase promotes segregation of telomeres through repression of RNA polymerase II  
1023 transcription. *Nat Cell Biol*. 13:1450-1456.

1024 Conrad, M.N., A.M. Dominguez, and M.E. Dresser. 1997. Ndj1p, a meiotic telomere protein  
1025 required for normal chromosome synapsis and segregation in yeast. *Science*. 276:1252-1255.

- 1026 Conrad, M.N., C.Y. Lee, G. Chao, M. Shinohara, H. Kosaka, A. Shinohara, J.A. Conchello,  
1027 and M.E. Dresser. 2008. Rapid telomere movement in meiotic prophase is promoted by NDJ1,  
1028 MPS3, and CSM4 and is modulated by recombination. *Cell*. 133:1175-1187.
- 1029 Conrad, M.N., C.Y. Lee, J.L. Wilkerson, and M.E. Dresser. 2007. MPS3 mediates meiotic  
1030 bouquet formation in *Saccharomyces cerevisiae*. *Proc Natl Acad Sci U S A*. 104:8863-8868.
- 1031 Crichton, J.H., C.J. Playfoot, and I.R. Adams. 2014. The role of chromatin modifications in  
1032 progression through mouse meiotic prophase. *J Genet Genomics*. 41:97-106.
- 1033 Duro, E., and A.L. Marston. 2015. From equator to pole: splitting chromosomes in mitosis and  
1034 meiosis. *Genes Dev*. 29:109-122.
- 1035 Fennell, A., A. Fernandez-Alvarez, K. Tomita, and J.P. Cooper. 2015. Telomeres and  
1036 centromeres have interchangeable roles in promoting meiotic spindle formation. *J Cell Biol*.  
1037 208:415-428.
- 1038 Fernandez-Alvarez, A., C. Bez, E.T. O'Toole, M. Morpew, and J.P. Cooper. 2016. Mitotic  
1039 Nuclear Envelope Breakdown and Spindle Nucleation Are Controlled by Interphase Contacts  
1040 between Centromeres and the Nuclear Envelope. *Dev Cell*. 39:544-559.
- 1041 Fernandez-Alvarez, A., and J.P. Cooper. 2017. Chromosomes Orchestrate Their Own  
1042 Liberation: Nuclear Envelope Disassembly. *Trends Cell Biol*. 27:255-265.
- 1043 Friederichs, J.M., S. Ghosh, C.J. Smoyer, S. McCroskey, B.D. Miller, K.J. Weaver, K.M.  
1044 Delventhal, J. Unruh, B.D. Slaughter, and S.L. Jaspersen. 2011. The SUN protein Mps3 is  
1045 required for spindle pole body insertion into the nuclear membrane and nuclear envelope  
1046 homeostasis. *PLoS Genet*. 7:e1002365.
- 1047 Gardner, J.M., C.J. Smoyer, E.S. Stensrud, R. Alexander, M. Gogol, W. Wiegraebe, and S.L.  
1048 Jaspersen. 2011. Targeting of the SUN protein Mps3 to the inner nuclear membrane by the  
1049 histone variant H2A.Z. *J Cell Biol*. 193:489-507.
- 1050 Gerhold, C.B., M.H. Hauer, and S.M. Gasser. 2015. INO80-C and SWR-C: guardians of the  
1051 genome. *J Mol Biol*. 427:637-651.
- 1052 Goldstein, A.L., and J.H. McCusker. 1999. Three new dominant drug resistance cassettes for  
1053 gene disruption in *Saccharomyces cerevisiae*. *Yeast*. 15:1541-1553.
- 1054 Gonzalez-Arranz, S., S. Cavero, M. Morillo-Huesca, E. Andujar, M. Perez-Alegre, F. Prado,  
1055 and P. San-Segundo. 2018. Functional Impact of the H2A.Z Histone Variant During Meiosis  
1056 in *Saccharomyces cerevisiae*. *Genetics*. 209:997-1015.
- 1057 Greaves, I.K., D. Rangasamy, M. Devoy, J.A. Marshall Graves, and D.J. Tremethick. 2006.  
1058 The X and Y chromosomes assemble into H2A.Z-containing facultative heterochromatin  
1059 following meiosis. *Mol Cell Biol*. 26:5394-5405.
- 1060 Horigome, C., Y. Oma, T. Konishi, R. Schmid, I. Marcomini, M.H. Hauer, V. Dion, M. Harata,  
1061 and S.M. Gasser. 2014. SWR1 and INO80 chromatin remodelers contribute to DNA double-  
1062 strand break perinuclear anchorage site choice. *Mol Cell*. 55:626-639.
- 1063 Hunter, N. 2015. Meiotic Recombination: The Essence of Heredity. *Cold Spring Harb Perspect*  
1064 *Biol*. 7: a016618.

- 1065 Janke, C., M.M. Magiera, N. Rathfelder, C. Taxis, S. Reber, H. Maekawa, A. Moreno-Borchart,  
1066 G. Doenges, E. Schwob, E. Schiebel, and M. Knop. 2004. A versatile toolbox for PCR-based  
1067 tagging of yeast genes: new fluorescent proteins, more markers and promoter substitution  
1068 cassettes. *Yeast*. 21:947-962.
- 1069 Kalocsay, M., N.J. Hiller, and S. Jentsch. 2009. Chromosome-wide Rad51 spreading and  
1070 SUMO-H2A.Z-dependent chromosome fixation in response to a persistent DNA double-strand  
1071 break. *Mol Cell*. 33:335-343.
- 1072 Katsumata, K., A. Hirayasu, J. Miyoshi, E. Nishi, K. Ichikawa, K. Tateho, A. Wakuda, H.  
1073 Matsuhara, and A. Yamamoto. 2016. A Taz1- and Microtubule-Dependent Regulatory  
1074 Relationship between Telomere and Centromere Positions in Bouquet Formation Secures  
1075 Proper Meiotic Divisions. *PLoS Genet*. 12:e1006304.
- 1076 Keeney, S., J. Lange, and N. Mohibullah. 2014. Self-organization of meiotic recombination  
1077 initiation: general principles and molecular pathways. *Annu Rev Genet*. 48:187-214.
- 1078 Kerppola, T.K. 2008. Bimolecular fluorescence complementation (BiFC) analysis as a probe  
1079 of protein interactions in living cells. *Annu Rev Biophys*. 37:465-487.
- 1080 Kobor, M.S., S. Venkatasubrahmanyam, M.D. Meneghini, J.W. Gin, J.L. Jennings, A.J. Link,  
1081 H.D. Madhani, and J. Rine. 2004. A protein complex containing the conserved Swi2/Snf2-  
1082 related ATPase Swr1p deposits histone variant H2A.Z into euchromatin. *PLoS Biol*. 2:E131.
- 1083 Kosaka, H., M. Shinohara, and A. Shinohara. 2008. Csm4-dependent telomere movement on  
1084 nuclear envelope promotes meiotic recombination. *PLoS Genet*. 4:e1000196.
- 1085 Koszul, R., K.P. Kim, M. Prentiss, N. Kleckner, and S. Kameoka. 2008. Meiotic chromosomes  
1086 move by linkage to dynamic actin cables with transduction of force through the nuclear  
1087 envelope. *Cell*. 133:1188-1201.
- 1088 Krogan, N.J., J. Dover, S. Khorrami, J.F. Greenblatt, J. Schneider, M. Johnston, and A.  
1089 Shilatifard. 2002. COMPASS, a histone H3 (Lysine 4) methyltransferase required for telomeric  
1090 silencing of gene expression. *J Biol Chem*. 277:10753-10755.
- 1091 Krogan, N.J., M.C. Keogh, N. Datta, C. Sawa, O.W. Ryan, H. Ding, R.A. Haw, J. Pootoolal,  
1092 A. Tong, V. Canadien, D.P. Richards, X. Wu, A. Emili, T.R. Hughes, S. Buratowski, and J.F.  
1093 Greenblatt. 2003. A Snf2 family ATPase complex required for recruitment of the histone H2A  
1094 variant Htz1. *Mol Cell*. 12:1565-1576.
- 1095 Langmead, B., C. Trapnell, M. Pop, and S.L. Salzberg. 2009. Ultrafast and memory-efficient  
1096 alignment of short DNA sequences to the human genome. *Genome Biol*. 10:R25.
- 1097 Lawrence, K.S., E.C. Tapley, V.E. Cruz, Q. Li, K. Aung, K.C. Hart, T.U. Schwartz, D.A. Starr,  
1098 and J. Engebrecht. 2016. LINC complexes promote homologous recombination in part through  
1099 inhibition of nonhomologous end joining. *J Cell Biol*. 215:801-821.
- 1100 Lee, C.Y., C.G. Bisig, M.M. Conrad, Y. Ditamo, L. Previato de Almeida, M.E. Dresser, and  
1101 R.J. Pezza. 2020. Extranuclear Structural Components that Mediate Dynamic Chromosome  
1102 Movements in Yeast Meiosis. *Curr Biol*. 30:1207-1216.

- 1103 Lee, C.Y., M.N. Conrad, and M.E. Dresser. 2012. Meiotic chromosome pairing is promoted by  
1104 telomere-led chromosome movements independent of bouquet formation. *PLoS Genet.*  
1105 8:e1002730.
- 1106 Lee, Y.L., and B. Burke. 2018. LINC complexes and nuclear positioning. *Semin Cell Dev Biol.*  
1107 82:67-76.
- 1108 Li, P., H. Jin, B.A. Koch, R.L. Abblett, X. Han, J.R. Yates, 3rd, and H.G. Yu. 2017. Cleavage  
1109 of the SUN-domain protein Mps3 at its N-terminus regulates centrosome disjunction in budding  
1110 yeast meiosis. *PLoS Genet.* 13:e1006830.
- 1111 Li, P., Y. Shao, H. Jin, and H.G. Yu. 2015. Ndj1, a telomere-associated protein, regulates  
1112 centrosome separation in budding yeast meiosis. *J Cell Biol.* 209:247-259.
- 1113 Link, J., and V. Jantsch. 2019. Meiotic chromosomes in motion: a perspective from *Mus*  
1114 *musculus* and *Caenorhabditis elegans*. *Chromosoma* 128:317-330.
- 1115 Longtine, M.S., A. McKenzie, 3rd, D.J. Demarini, N.G. Shah, A. Wach, A. Brachat, P.  
1116 Philippsen, and J.R. Pringle. 1998. Additional modules for versatile and economical PCR-based  
1117 gene deletion and modification in *Saccharomyces cerevisiae*. *Yeast.* 14:953-961.
- 1118 Luk, E., A. Ranjan, P.C. Fitzgerald, G. Mizuguchi, Y. Huang, D. Wei, and C. Wu. 2010.  
1119 Stepwise histone replacement by SWR1 requires dual activation with histone H2A.Z and  
1120 canonical nucleosome. *Cell.* 143:725-736.
- 1121 Martins-Taylor, K., U. Sharma, T. Rozario, and S.G. Holmes. 2011. H2A.Z (Htz1) controls the  
1122 cell-cycle-dependent establishment of transcriptional silencing at *Saccharomyces cerevisiae*  
1123 telomeres. *Genetics.* 187:89-104.
- 1124 Meneghini, M.D., M. Wu, and H.D. Madhani. 2003. Conserved histone variant H2A.Z protects  
1125 euchromatin from the ectopic spread of silent heterochromatin. *Cell.* 112:725-736.
- 1126 Michaelis, C., R. Ciosk, and K. Nasmyth. 1997. Cohesins: chromosomal proteins that prevent  
1127 premature separation of sister chromatids. *Cell.* 91:35-45.
- 1128 Miller, K.E., Y. Kim, W.K. Huh, and H.O. Park. 2015. Bimolecular Fluorescence  
1129 Complementation (BiFC) Analysis: Advances and Recent Applications for Genome-Wide  
1130 Interaction Studies. *J Mol Biol.* 427:2039-2055.
- 1131 Mizuguchi, G., X. Shen, J. Landry, W.H. Wu, S. Sen, and C. Wu. 2004. ATP-driven exchange  
1132 of histone H2AZ variant catalyzed by SWR1 chromatin remodeling complex. *Science.*  
1133 303:343-348.
- 1134 Morillo-Huesca, M., M. Clemente-Ruiz, E. Andujar, and F. Prado. 2010. The SWR1 histone  
1135 replacement complex causes genetic instability and genome-wide transcription misregulation  
1136 in the absence of H2A.Z. *PLoS One.* 5:e12143.
- 1137 Morillo-Huesca, M., M. Murillo-Pineda, M. Barrientos-Moreno, E. Gomez-Marin, M.  
1138 Clemente-Ruiz, and F. Prado. 2019. Actin and Nuclear Envelope Components Influence  
1139 Ectopic Recombination in the Absence of Swr1. *Genetics.* 213:819-834.
- 1140 Neumann, F.R., V. Dion, L.R. Gehlen, M. Tsai-Pflugfelder, R. Schmid, A. Taddei, and S.M.  
1141 Gasser. 2012. Targeted INO80 enhances subnuclear chromatin movement and ectopic  
1142 homologous recombination. *Genes Dev.* 26:369-383.

- 1143 Ontoso, D., I. Acosta, F. van Leeuwen, R. Freire, and P.A. San-Segundo. 2013. Dot1-dependent  
1144 histone H3K79 methylation promotes activation of the Mek1 meiotic checkpoint effector  
1145 kinase by regulating the Hop1 adaptor. *PLoS Genet.* 9:e1003262.
- 1146 Ontoso, D., L. Kauppi, S. Keeney, and P.A. San-Segundo. 2014. Dynamics of DOT1L  
1147 localization and H3K79 methylation during meiotic prophase I in mouse spermatocytes.  
1148 *Chromosoma.* 123:147-164.
- 1149 Qin, Y., L. Zhao, M.I. Skaggs, S. Andreuzza, T. Tsukamoto, A. Panoli, K.N. Wallace, S. Smith,  
1150 I. Siddiqi, Z. Yang, R. Yadegari, and R. Palanivelu. 2014. ACTIN-RELATED PROTEIN6  
1151 Regulates Female Meiosis by Modulating Meiotic Gene Expression in Arabidopsis. *Plant Cell.*  
1152 26:1612-1628.
- 1153 Raisner, R.M., P.D. Hartley, M.D. Meneghini, M.Z. Bao, C.L. Liu, S.L. Schreiber, O.J. Rando,  
1154 and H.D. Madhani. 2005. Histone variant H2A.Z marks the 5' ends of both active and inactive  
1155 genes in euchromatin. *Cell.* 123:233-248.
- 1156 Rao, H.B., M. Shinohara, and A. Shinohara. 2011. Mps3 SUN domain is important for  
1157 chromosome motion and juxtaposition of homologous chromosomes during meiosis. *Genes*  
1158 *Cells.* 16:1081-1096.
- 1159 Rockmill, B. 2009. Chromosome spreading and immunofluorescence methods in  
1160 *Saccharomyces cerevisiae.* *Methods Mol Biol.* 558:3-13.
- 1161 Rockmill, B., and G.S. Roeder. 1990. Meiosis in asynaptic yeast. *Genetics.* 126:563-574.
- 1162 Rosa, M., M. Von Harder, R.A. Cigliano, P. Schlogelhofer, and O. Mittelsten Scheid. 2013.  
1163 The Arabidopsis SWR1 chromatin-remodeling complex is important for DNA repair, somatic  
1164 recombination, and meiosis. *Plant Cell.* 25:1990-2001.
- 1165 Scherthan, H., H. Wang, C. Adelfalk, E.J. White, C. Cowan, W.Z. Cande, and D.B. Kaback.  
1166 2007. Chromosome mobility during meiotic prophase in *Saccharomyces cerevisiae.* *Proc Natl*  
1167 *Acad Sci U S A.* 104:16934-16939.
- 1168 Sheff, M.A., and K.S. Thorn. 2004. Optimized cassettes for fluorescent protein tagging in  
1169 *Saccharomyces cerevisiae.* *Yeast.* 21:661-670.
- 1170 Sonntag Brown, M., S. Zanders, and E. Alani. 2011. Sustained and rapid chromosome  
1171 movements are critical for chromosome pairing and meiotic progression in budding yeast.  
1172 *Genetics.* 188:21-32.
- 1173 Stuckey, S., and F. Storici. 2013. Gene knockouts, in vivo site-directed mutagenesis and other  
1174 modifications using the delitto perfetto system in *Saccharomyces cerevisiae.* *Methods Enzymol.*  
1175 533:103-131.
- 1176 Sung, M.K., and W.K. Huh. 2007. Bimolecular fluorescence complementation analysis system  
1177 for in vivo detection of protein-protein interaction in *Saccharomyces cerevisiae.* *Yeast.* 24:767-  
1178 775.
- 1179 Tomita, K., and J.P. Cooper. 2007. The telomere bouquet controls the meiotic spindle. *Cell.*  
1180 130:113-126.



- 1181 Trelles-Sticken, E., S. Bonfils, J. Sollier, V. Geli, H. Scherthan, and C. de La Roche Saint-  
1182 Andre. 2005. Set1- and Clb5-deficiencies disclose the differential regulation of centromere and  
1183 telomere dynamics in *Saccharomyces cerevisiae* meiosis. *J Cell Sci.* 118:4985-4994.
- 1184 Trelles-Sticken, E., M.E. Dresser, and H. Scherthan. 2000. Meiotic telomere protein Ndj1p is  
1185 required for meiosis-specific telomere distribution, bouquet formation and efficient homologue  
1186 pairing. *J Cell Biol.* 151:95-106.
- 1187 Trelles-Sticken, E., J. Loidl, and H. Scherthan. 1999. Bouquet formation in budding yeast:  
1188 initiation of recombination is not required for meiotic telomere clustering. *J Cell Sci.* 112:651-  
1189 658.
- 1190 Uetz, P., L. Giot, G. Cagney, T.A. Mansfield, R.S. Judson, J.R. Knight, D. Lockshon, V.  
1191 Narayan, M. Srinivasan, P. Pochart, A. Qureshi-Emili, Y. Li, B. Godwin, D. Conover, T.  
1192 Kalbfleisch, G. Vijayadamodar, M. Yang, M. Johnston, S. Fields, and J.M. Rothberg. 2000. A  
1193 comprehensive analysis of protein-protein interactions in *Saccharomyces cerevisiae*. *Nature.*  
1194 403:623-627.
- 1195 Wanat, J.J., K.P. Kim, R. Koszul, S. Zanders, B. Weiner, N. Kleckner, and E. Alani. 2008.  
1196 Csm4, in collaboration with Ndj1, mediates telomere-led chromosome dynamics and  
1197 recombination during yeast meiosis. *PLoS Genet.* 4:e1000188.
- 1198 Weber, C.M., and S. Henikoff. 2014. Histone variants: dynamic punctuation in transcription.  
1199 *Genes Dev.* 28:672-682.
- 1200 Yamada, S., K. Kugou, D.Q. Ding, Y. Fujita, Y. Hiraoka, H. Murakami, K. Ohta, and T.  
1201 Yamada. 2018a. The conserved histone variant H2A.Z illuminates meiotic recombination  
1202 initiation. *Curr Genet.* 64:1015-1019.
- 1203 Yamada, S., K. Kugou, D.Q. Ding, Y. Fujita, Y. Hiraoka, H. Murakami, K. Ohta, and T.  
1204 Yamada. 2018b. The histone variant H2A.Z promotes initiation of meiotic recombination in  
1205 fission yeast. *Nucleic Acids Res.* 46:609-620.
- 1206 Yamada, T., and K. Ohta. 2013. Initiation of meiotic recombination in chromatin structure. *J*  
1207 *Biochem.* 154:107-114.
- 1208 Yu, H., P. Braun, M.A. Yildirim, I. Lemmens, K. Venkatesan, J. Sahalie, T. Hirozane-  
1209 Kishikawa, F. Gebreab, N. Li, N. Simonis, T. Hao, J.F. Rual, A. Dricot, A. Vazquez, R.R.  
1210 Murray, C. Simon, L. Tardivo, S. Tam, N. Svrikapa, C. Fan, A.S. de Smet, A. Motyl, M.E.  
1211 Hudson, J. Park, X. Xin, M.E. Cusick, T. Moore, C. Boone, M. Snyder, F.P. Roth, A.L.  
1212 Barabasi, J. Tavernier, D.E. Hill, and M. Vidal. 2008. High-quality binary protein interaction  
1213 map of the yeast interactome network. *Science.* 322:104-110.
- 1214 Yue, J.X., J. Li, L. Aigrain, J. Hallin, K. Persson, K. Oliver, A. Bergstrom, P. Coupland, J.  
1215 Warringer, M.C. Lagomarsino, G. Fischer, R. Durbin, and G. Liti. 2017. Contrasting  
1216 evolutionary genome dynamics between domesticated and wild yeasts. *Nat Genet.* 49:913-924.
- 1217 Zhang, Y., T. Liu, C.A. Meyer, J. Eeckhoutte, D.S. Johnson, B.E. Bernstein, C. Nusbaum, R.M.  
1218 Myers, M. Brown, W. Li, and X.S. Liu. 2008. Model-based analysis of ChIP-Seq (MACS).  
1219 *Genome Biol.* 9:R137.
- 1220 Zickler, D., and N. Kleckner. 2015. Recombination, Pairing, and Synapsis of Homologs during  
1221 Meiosis. *Cold Spring Harb Perspect Biol.* 7:a016626.

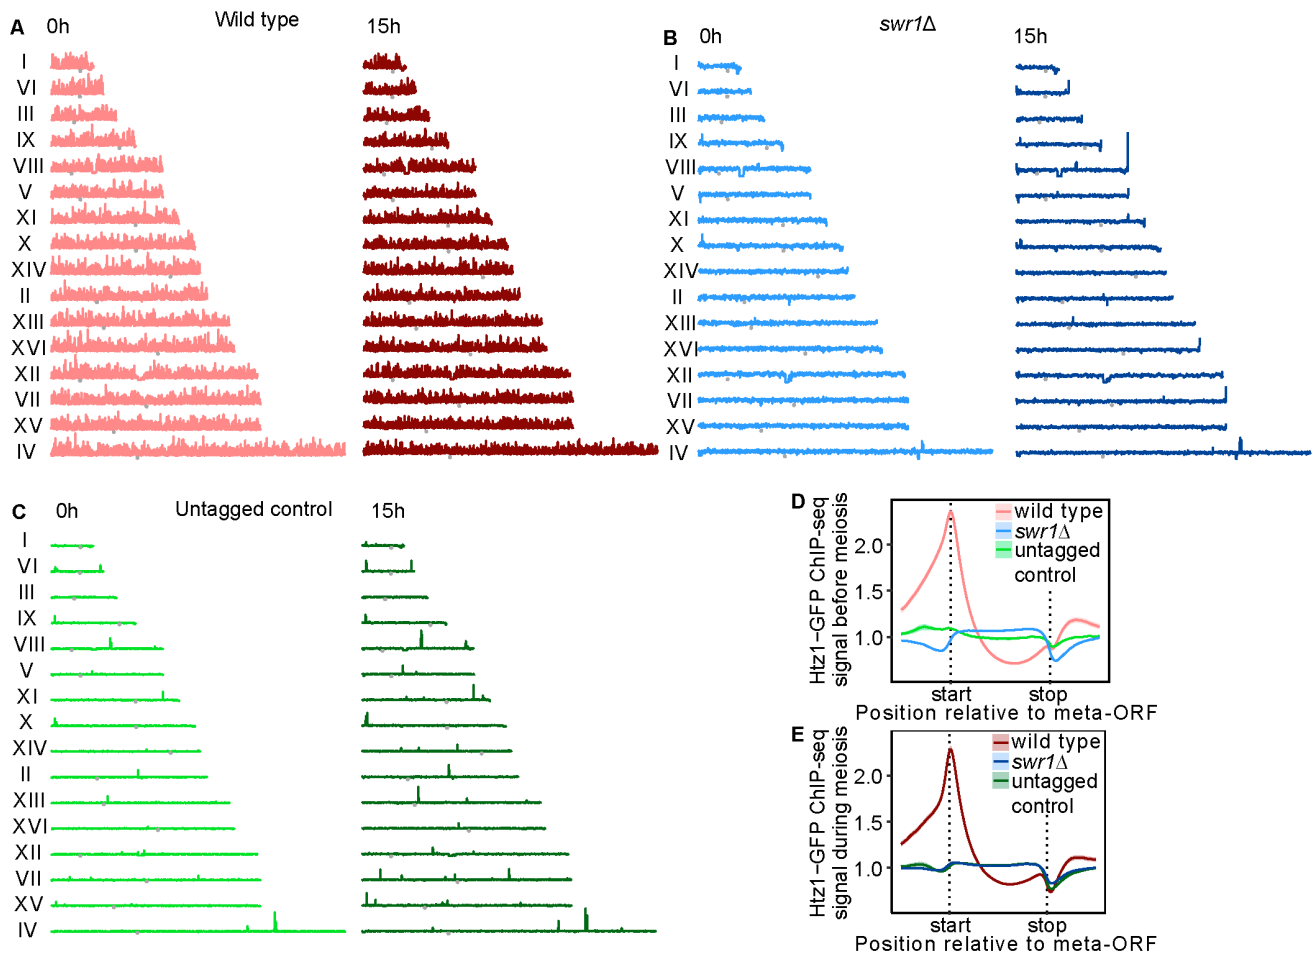

**Figure S1. Genome-wide incorporation of H2A.Z to meiotic chromatin depends on SWR1.** (Related to Figure 1)

Profiles of H2A.Z binding to all chromosomes in wild type (**A**), *swr1Δ* (**B**), and the untagged control (**C**), determined by ChIP-seq. Gray points indicate the location of the centromere. (**D-E**) Metagenes analysis of H2A.Z binding by ChIP-seq. The ORFs are scaled to the “Start” and “Stop” positions, and up- and downstream flanking regions represent half the size of the ORF. Samples were taken at 0 h and 15 h after meiotic induction. Anti-GFP antibodies were used to immunoprecipitate H2A.Z-GFP. Strains are: DP840 (*HTZ1-GFP*), DP841 (*HTZ1-GFP swr1Δ*) and DP421 (*HTZ1* untagged control).



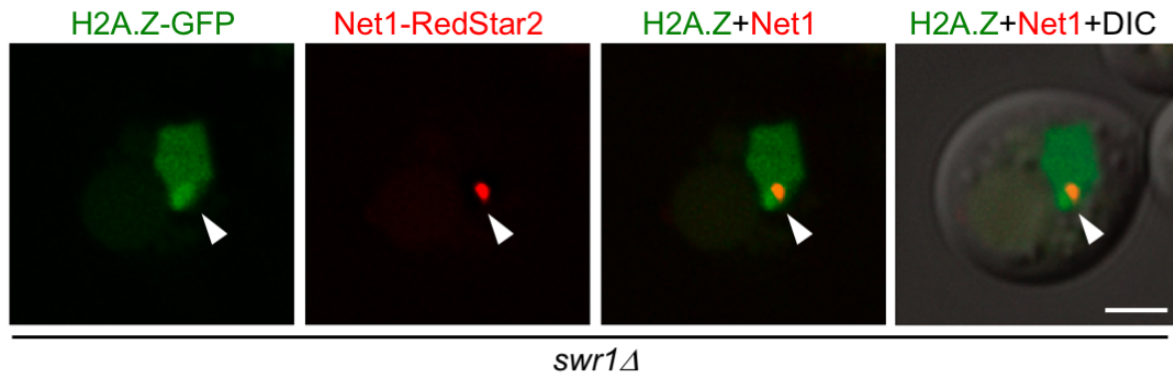

**Figure S2. A fraction of H2A.Z accumulates in the vicinity of the nucleolus in *swr1Δ*** (Related to Figure 2).

Microscopy fluorescence images of *swr1Δ* cells expressing *HTZI-GFP* and *NET1-RedStar2* as a nucleolar marker. A single plane of a representative cell displaying a diffuse peripheral accumulation of H2A.Z is shown. The arrowhead points to the nucleolar area marked by Net1. Images were taken 16 h after meiotic induction. Scale bar, 2  $\mu$ m. The strain is DP1189 (*swr1Δ HTZI-GFP NET1-RedStar2*).

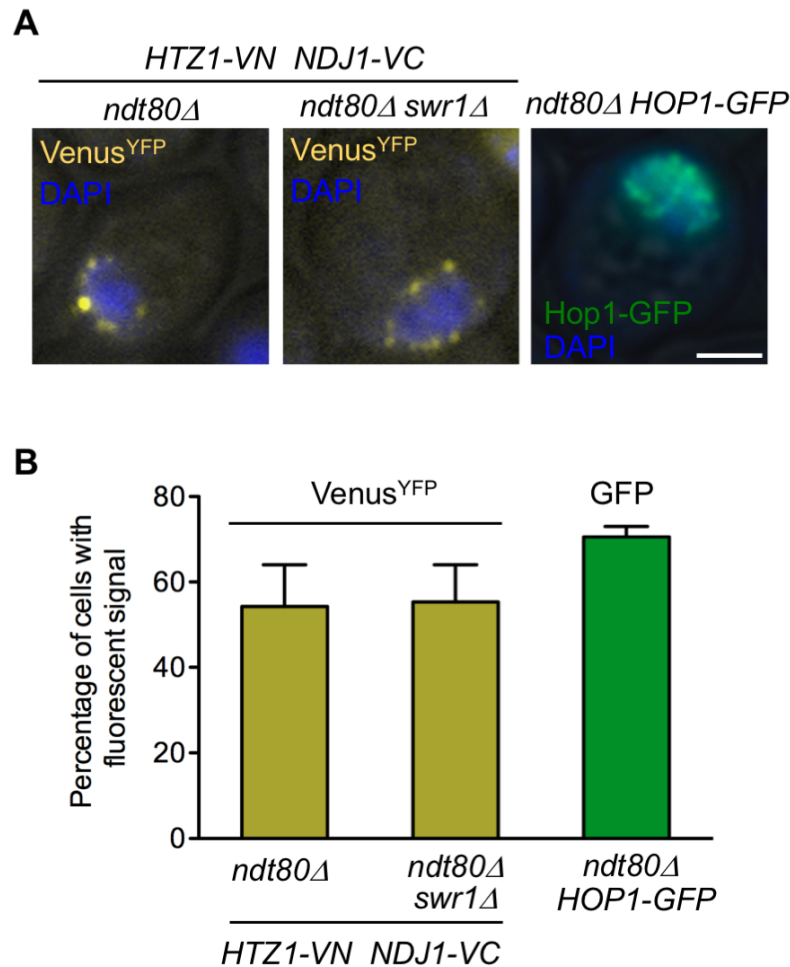

**Figure S3. BiFC analysis of H2A.Z-Ndj1 interaction in *ndt80Δ* cells (Related to Figure 3).**

(A) Microscopy fluorescence images of *ndt80Δ* and *ndt80Δ swr1Δ* cells expressing *HTZ1* fused to the N-terminal half of the Venus<sup>YFP</sup> (*VN*) and *NDJ1* fused to the C-terminal half of the Venus<sup>YFP</sup> (*VC*). Nuclei are stained with DAPI (blue). The reconstitution of Venus<sup>YFP</sup> fluorescence resulting from H2A.Z-VN/Ndj1-VC interaction appears in yellow. A parallel meiotic culture of *ndt80Δ* cells expressing *HOP1-GFP* (green) was used as control for meiotic prophase I staging. Images were taken 24 h after meiotic induction. Representative cells are shown. Scale bar, 2  $\mu$ m (B) Quantification of the percentage of cells displaying Venus<sup>YFP</sup> fluorescent signal or Hop1-GFP signal, as indicated. The analysis was performed in triplicate. More than 300 cells were scored in every experiment. Error bars, SD. Strains are: DP1748 (*ndt80Δ HTZ1-VN NDJ1-VC*), DP1749 (*ndt80Δ swr1Δ HTZ1-VN NDJ1-VC*) and DP963 (*ndt80Δ HOP1-GFP*).

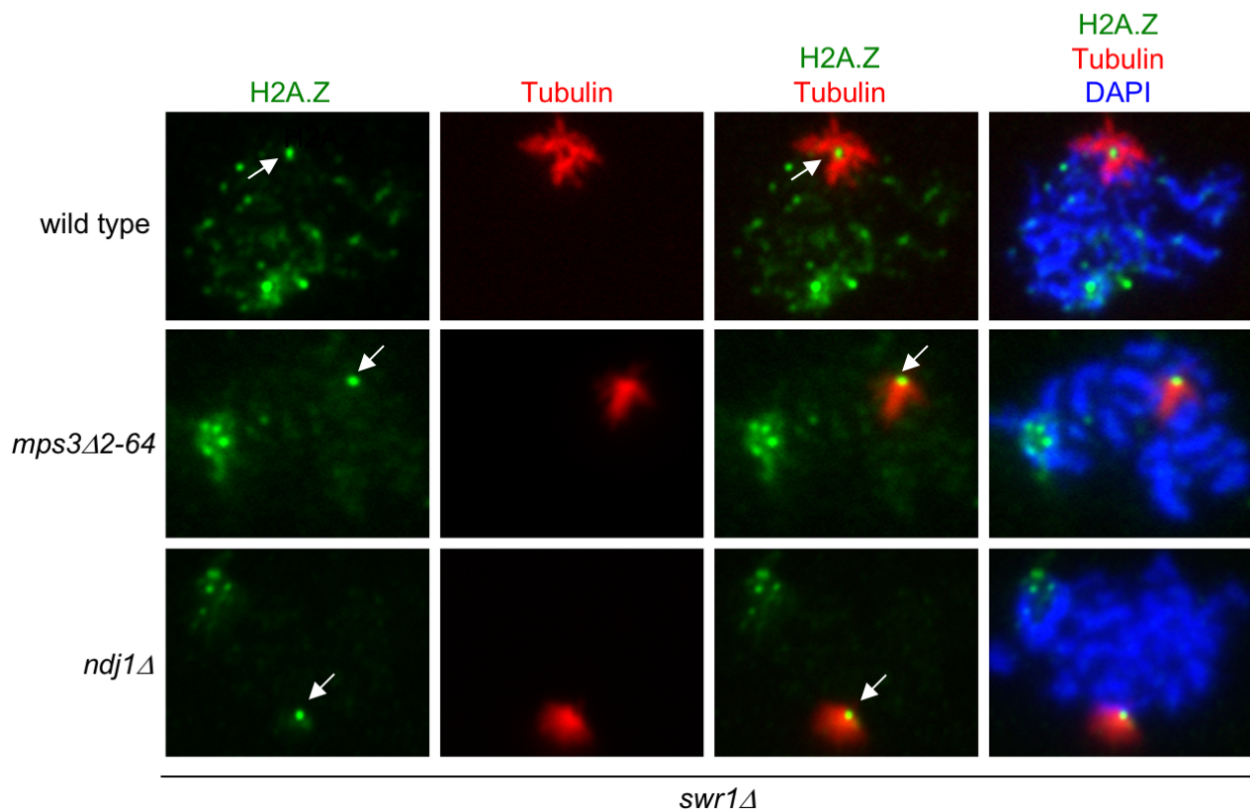

**Figure S4. Localization of H2A.Z to the SPB is independent of Ndj1 and the 2-64 N-terminal domain of Mps3. (Related to Figure 5)**

Immunofluorescence of representative spread pachytene nuclei stained with DAPI to visualize chromatin (blue), anti-GFP to detect H2A.Z (green), and anti-tubulin to mark the monopolar prophase spindle (red). The arrow points to an H2A.Z focus present at the center of the bushy spindle corresponding to the SPB location. Strains are DP1395 (wild type), DP1280 (*mps3*-Δ2-64) and DP1305 (*ndj1*Δ). 25, 21 and 23 nuclei were examined for wild type, *mps3*-Δ2-64 and *ndj1*Δ, respectively.

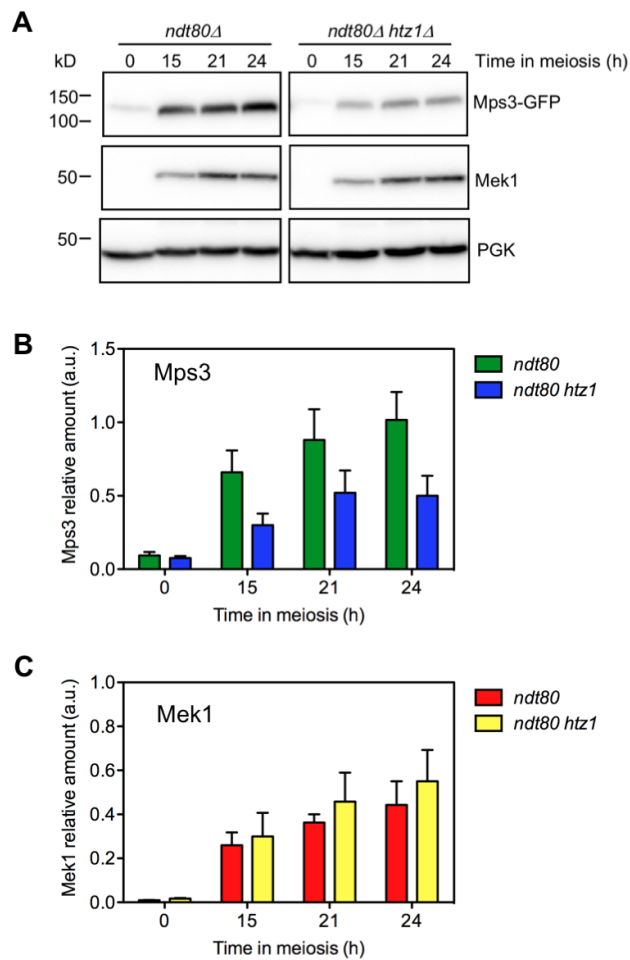

**Figure S5. Mps3 global levels are reduced in *ndt80Δ*-arrested cells lacking H2A.Z. (Related to Figure 6)**

(A) Western blot analysis of Mps3-GFP and Mek1 production during meiosis detected with anti-GFP and anti-Mek1 antibodies, respectively. PGK was used as a loading control. A representative blot is shown. (B-C) Quantification of Mps3-GFP (B) and Mek1 (C) levels normalized to PGK. Average and SEM (error bars) from three independent experiments are shown. Strains are: DP1014 (*ndt80Δ MPS3-GFP*) and DP1013 (*ndt80Δ htz1Δ MPS3-GFP*).

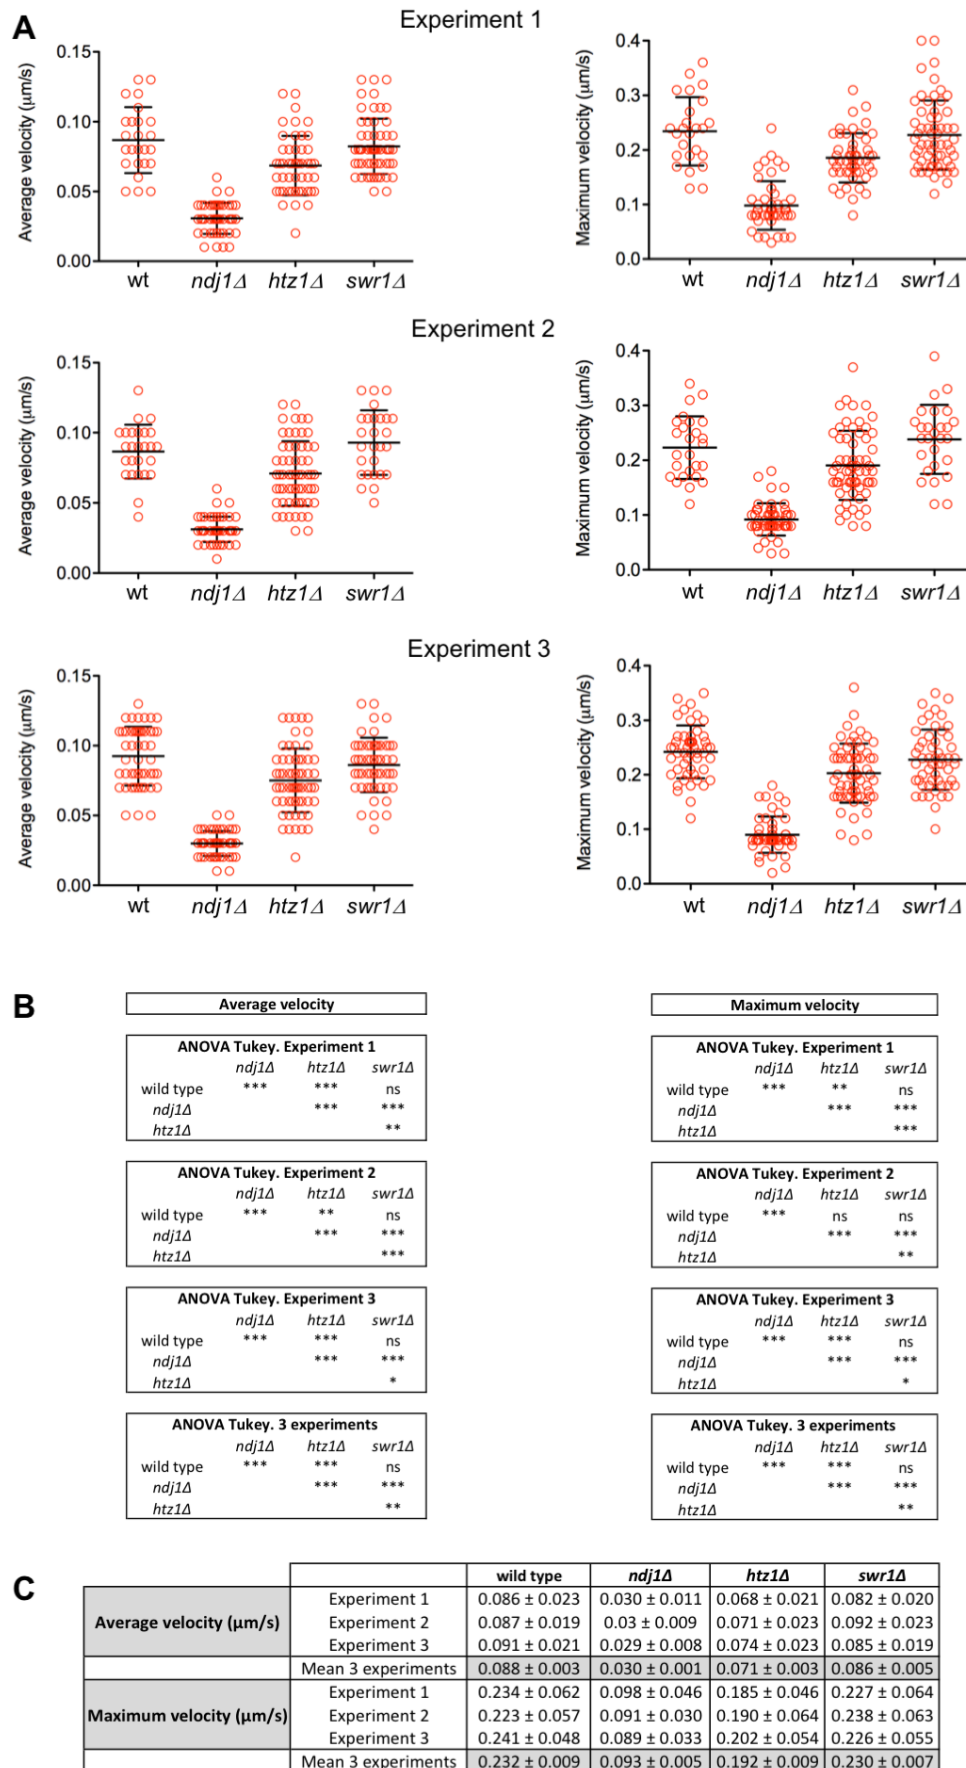

**Figure S6. Analysis of *TEL4L* movement. (Related to Figure 8).**

(A) Measurement of average velocity and maximum velocity in three independent time-lapse experiments tracking *TEL4L* movement marked with GFP as depicted in Figure 8. Error bars, SD. (B) ANOVA statistical analysis of the velocity data obtained in every individual experiment as well as combining the data from all three experiments. (C) Mean values for average and maximum velocity. Strains are DP1692 (wild type), DP1722 (*ndj1Δ*), DP1693 (*htz1Δ*) and DP1694 (*swr1Δ*).



**Table S1. *Saccharomyces cerevisiae* strains**

| <b>Strain</b> | <b>Genotype</b>                                                                                                  | <b>Source</b> |
|---------------|------------------------------------------------------------------------------------------------------------------|---------------|
| DP421         | <i>MATa/MAT<math>\alpha</math> leu2,3-112 his4-260 thr1-4 ura3-1 trp1-289 ade2-1 lys2<math>\Delta</math>NheI</i> | PSS Lab       |
| DP838         | DP421 <i>htz1::URA3 ZIP1-GFP</i>                                                                                 | This work     |
| DP840         | DP421 <i>HTZ1-GFP::kanMX6</i>                                                                                    | PSS Lab       |
| DP841         | DP421 <i>swr1::natMX4 HTZ1-GFP::kanMX6</i>                                                                       | PSS Lab       |
| DP866         | DP421 <i>MPS3-GFP::kanMX6</i>                                                                                    | This work     |
| DP867         | DP421 <i>htz1::URA3 MPS3-GFP::kanMX6</i>                                                                         | This work     |
| DP957         | DP421 <i>ndj1::natMX4 ZIP1-GFP</i>                                                                               | This work     |
| DP963         | DP421 <i>ndt80::LEU2 HOP1-GFP::kanMX6</i>                                                                        | PSS Lab       |
| DP1013        | DP421 <i>ndt80:LEU2 htz1::URA3 MPS3-GFP::kanMX6</i>                                                              | This work     |
| DP1014        | DP421 <i>ndt80:LEU2 MPS3-GFP::kanMX6</i>                                                                         | This work     |
| DP1032        | DP421 <i>MPS3-GFP::kanMX6 HOP1-mCherry::natMX4</i>                                                               | This work     |
| DP1033        | DP421 <i>htz1::URA3 MPS3-GFP::kanMX6 HOP1-mCherry::natMX4</i>                                                    | This work     |
| DP1057        | DP421 <i>ZIP1-GFP PMA1-mCherry::natMX4</i>                                                                       | This work     |
| DP1091        | DP421 <i>swr1::natMX4 ZIP1-GFP</i>                                                                               | This work     |
| DP1102        | DP421 <i>swr1::natMX4 MPS3-GFP::kanMX6</i>                                                                       | This work     |
| DP1103        | DP421 <i>ndj1::natMX4 MPS3-GFP::kanMX6</i>                                                                       | This work     |
| DP1108        | DP421 <i>swr1::natMX4 HTZ1-GFP::kanMX6 MPS3-mCherry::hphMX4</i>                                                  | This work     |
| DP1172        | DP421 <i>HTZ1-GFP::kanMX6 CNM67-mCherry::natMX4 swr1::hphMX4</i>                                                 | This work     |
| DP1182        | DP421 <i>HTZ1-GFP::kanMX6 swr1::hphMX4</i>                                                                       | This work     |
| DP1189        | DP421 <i>HTZ1-GFP::kanMX6 NET1-RedStar2::natNT2 swr1::hphMX4</i>                                                 | This work     |
| DP1280        | DP421 <i>mps3::hphMX4 pSS326 [mps3<math>\Delta</math>2-64-mCherry URA3] HTZ1-GFP::kanMX6 swr1::natMX4</i>        | This work     |
| DP1305        | DP421 <i>HTZ1-GFP::kanMX6 swr1::natMX4 ndj1::hphMX4</i>                                                          | This work     |
| DP1330        | DP421 <i>MPS3-3HA::kanMX6</i>                                                                                    | This work     |

|        |                                                                                                                          |           |
|--------|--------------------------------------------------------------------------------------------------------------------------|-----------|
| DP1394 | DP421 <i>MPS3-3HA::natMX4 HTZ1-GFP::kanMX6</i>                                                                           | This work |
| DP1395 | DP421 <i>swr1::hphMX4 MPS3-3HA::natMX4 HTZ1-GFP::kanMX6</i>                                                              | This work |
| DP1493 | DP421 <i>swr1::hphMX4 HTZ1-VN::TRP1 NDJ1-VC::kanMX6</i>                                                                  | This work |
| DP1496 | DP421 <i>HTZ1-VN::TRP1 NDJ1-VC::kanMX6</i>                                                                               | This work |
| DP1506 | DP421 <i>SPC110-RedStar2::natNT2/SPC110 HTZ1-VN::TRP1 NDJ1-VC::kanMX6 swr1::hphMX4</i>                                   | This work |
| DP1511 | DP421 <i>mps3::natMX4 pSS269 [MPS3-mCherry URA3] HTZ1-VN::TRP1 NDJ1-VC::kanMX6</i>                                       | This work |
| DP1512 | DP421 <i>mps3::natMX4 pSS326 [mps3Δ2-64-mCherry URA3] HTZ1-VN::TRP1 NDJ1-VC::kanMX6</i>                                  | This work |
| DP1540 | DP421 <i>HTZ1-VN::TRP1</i>                                                                                               | This work |
| DP1541 | DP421 <i>NDJ1-VC::kanMX6</i>                                                                                             | This work |
| DP1576 | DP421 <i>MPS3-GFP::kanMX6 swr1::natMX4 SPC110-mCherry::hphNT1/SPC110</i>                                                 | This work |
| DP1578 | DP421 <i>HTZ1-GFP::kanMX6 swr1::natMX4 SPC110-mCherry::hphNT1/SPC110</i>                                                 | This work |
| DP1692 | DP421 <i>P<sub>CUP1</sub>-IME1::kanMX6 ZIP1-mCherry/ZIP1 TEL4L-tetO(50)::URA3/TEL4L TetR-GFP::LEU2/leu2</i>              | This work |
| DP1693 | DP421 <i>htz1::natMX4 P<sub>CUP1</sub>-IME1::kanMX6 ZIP1-mCherry/ZIP1 TEL4L-tetO(50)::URA3/TEL4L TetR-GFP::LEU2/leu2</i> | This work |
| DP1694 | DP421 <i>swr1::hphMX4 P<sub>CUP1</sub>-IME1::kanMX6 ZIP1-mCherry/ZIP1 TEL4L-tetO(50)::URA3/TEL4L TetR-GFP::LEU2/leu2</i> | This work |
| DP1722 | DP421 <i>ndj1::kanMX6 P<sub>CUP1</sub>-IME1::kanMX6 ZIP1-mCherry/ZIP1 TEL4L-tetO(50)::URA3/TEL4L TetR-GFP::LEU2/leu2</i> | This work |
| DP1748 | DP421 <i>ndt80::natMX4 HTZ1-VN::TRP1 NDJ1-VC::kanMX6</i>                                                                 | This work |
| DP1749 | DP421 <i>ndt80::natMX4 swr1::hphMX4 HTZ1-VN::TRP1 NDJ1-VC::kanMX6</i>                                                    | This work |

\*All strains are diploids isogenic to BR1919 (Rockmill and Roeder, 1990). Unless specified, all strains are homozygous for the indicated markers. DP421 is a *lys2* version of the original BR1919-2N.

Rockmill, B., and G.S. Roeder. 1990. Meiosis in asynaptic yeast. *Genetics*. 126:563-574.

**Table S2. Plasmids**

| <b>Plasmid</b>    | <b>Vector</b> | <b>Relevant parts</b>                                 | <b>Source/Reference</b>                             |
|-------------------|---------------|-------------------------------------------------------|-----------------------------------------------------|
| pSS266            | pJET2.1       | <i>MPS3-mCherry</i>                                   | This work                                           |
| pSS267            | pRS424        | <i>2<math>\mu</math> TRP1 MPS3-mCherry</i>            | This work                                           |
| pSS269            | pRS316        | <i>CEN6 URA3 MPS3-mCherry</i>                         | This work                                           |
| pSS326            | pRS316        | <i>CEN6 URA3 mps3-2-64<math>\Delta</math>-mCherry</i> | This work                                           |
| pSS329<br>(pAC32) | unknown       | <i>tetR-NLS-GFP::LEU2</i>                             | Andrés Clemente (IBFG)/<br>(Michaelis et al., 1997) |
| pSS330<br>(pAC18) | pRS406        | <i>TEL4L-tetO(50)::URA3</i>                           | Andrés Clemente (IBFG)                              |
| pFN21             | pFA6a         | <i>mCherry::natMX4</i>                                | César Roncero (IBFG)                                |

Michaelis, C., R. Ciosk, and K. Nasmyth. 1997. Cohesins: chromosomal proteins that prevent premature separation of sister chromatids. *Cell*. 91:35-45.

**Table S3. Primary and secondary antibodies**

| <b>Antibody</b>    | <b>Host and type</b> | <b>Application*<br/>(Dilution)</b> | <b>Source / Reference</b> |
|--------------------|----------------------|------------------------------------|---------------------------|
| H2A (acidic patch) | Rabbit polyclonal    | WB (1:5000)                        | Merck 07-146              |
| H2A.Z              | Rabbit polyclonal    | WB (1:1000)                        | Active Motif 39647        |
| H2B                | Rabbit polyclonal    | WB (1:5000)                        | Abcam ab1790              |
| H3                 | Rabbit polyclonal    | WB (1:5000)                        | Abcam ab1791              |
| H4                 | Rabbit polyclonal    | WB (1:1000)                        | Abcam ab10158             |
| Zip1               | Rabbit polyclonal    | IF (1:300)                         | S. Roeder                 |
| HA (12CA5)         | Mouse monoclonal     | WB (1:1000)                        | Roche 11666606001         |
| HA (3F10)          | Rat monoclonal       | IF (1:225)                         | Roche 11867431001         |
| GFP (JL-8)         | Mouse monoclonal     | WB (1:1000-1:2000)<br>IF (1:200)   | Clontech 632381           |
| GFP                | Rabbit polyclonal    | ChIP-seq                           | R. Freire                 |
| mCherry/DsRed      | Rabbit polyclonal    | IF (1:200)                         | Clontech 632496           |
| Pgk1 (22C5D8)      | Mouse monoclonal     | WB (1:5000)                        | Invitrogen 459250         |
| Mek1               | Rabbit polyclonal    | WB (1:1000)                        | Ontoso et al., 2013       |
| Tubulin            | Rabbit monoclonal    | IF (1:500)                         | Abcam EPR13798            |
| Anti-mouse-HRP     | Sheep polyclonal     | WB (1:5000)                        | GE-Healthcare NA931       |
| Anti-rabbit-HRP    | Donkey polyclonal    | WB (1:5000)                        | GE-Healthcare NA934       |
| Anti-mouse AF488   | Goat polyclonal      | IF (1:200)                         | Invitrogen A11029         |
| Anti-rabbit AF594  | Goat polyclonal      | IF (1:200)                         | Invitrogen A11012         |
| Anti-rat AF568     | Goat polyclonal      | IF (1:200)                         | Invitrogen A11077         |

\*WB, western blot; IF, immunofluorescence; ChIP-seq, chromatin immunoprecipitation-sequencing

Ontoso, D., I. Acosta, F. van Leeuwen, R. Freire, and P.A. San-Segundo. 2013. Dot1-dependent histone H3K79 methylation promotes activation of the Mek1 meiotic checkpoint effector kinase by regulating the Hop1 adaptor. *PLoS Genet.* 9:e1003262.
